# Supplementary material for: Decline in new drug launches: myth or reality? Retrospective observational study using 30 years of data from the UK
Source: PubMed Central journal article supplement — BMJ Open. 2013 Feb 19;3(2):e002088. doi: 10.1136/bmjopen-2012-002088 (PMC3585972; doi:10.1136/bmjopen-2012-002088), 2013-02-19
Supplement: bmjopen-2012-002088.draft_revisions.pdf [file bmjopen-2012-002088.draft_revisions.pdf]

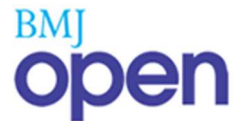

**Declines in new drug launches: myth or reality?  
Retrospective observational study using 30 years of data  
from the United Kingdom.**

|                                 |                                                                                                                                                                                                                                                                                                                                                                                                                                                                   |
|---------------------------------|-------------------------------------------------------------------------------------------------------------------------------------------------------------------------------------------------------------------------------------------------------------------------------------------------------------------------------------------------------------------------------------------------------------------------------------------------------------------|
| Journal:                        | <i>BMJ Open</i>                                                                                                                                                                                                                                                                                                                                                                                                                                                   |
| Manuscript ID:                  | bmjopen-2012-002088                                                                                                                                                                                                                                                                                                                                                                                                                                               |
| Article Type:                   | Research                                                                                                                                                                                                                                                                                                                                                                                                                                                          |
| Date Submitted by the Author:   | 10-Sep-2012                                                                                                                                                                                                                                                                                                                                                                                                                                                       |
| Complete List of Authors:       | Ward, Derek; University of Birmingham, NIHR Horizon Scanning Centre; Public Health, Epidemiology and Biostatistics<br>Martino, Orsolina; University of Birmingham, NIHR Horizon Scanning Centre; Public Health, Epidemiology and Biostatistics<br>Simpson, Sue; University of Birmingham, NIHR Horizon Scanning Centre; Public Health, Epidemiology and Biostatistics<br>Stevens, Andrew; University of Birmingham, Public Health, Epidemiology and Biostatistics |
| <b>Primary Subject Heading</b>: | Health services research                                                                                                                                                                                                                                                                                                                                                                                                                                          |
| Secondary Subject Heading:      | Pharmacology and therapeutics                                                                                                                                                                                                                                                                                                                                                                                                                                     |
| Keywords:                       | Innovation, Pharmaceutical, New drugs, Drug launches, United Kingdom                                                                                                                                                                                                                                                                                                                                                                                              |
|                                 |                                                                                                                                                                                                                                                                                                                                                                                                                                                                   |

SCHOLARONE™  
Manuscripts

1  
2  
3 **Declines in new drug launches: myth or reality? Retrospective**  
4  
5 **observational study using 30 years of data from the United Kingdom.**  
6  
7

8  
9 Derek J Ward, clinical senior lecturer,<sup>1</sup> Orsolina I Martino, research fellow,<sup>1</sup> Sue Simpson,  
10  
11 research fellow,<sup>1</sup> Andrew Stevens, professor of public health<sup>2</sup>  
12

13  
14 <sup>1</sup> NIHR Horizon Scanning Centre, University of Birmingham, B15 2SQ.  
15

16 <sup>2</sup> Public Health, Epidemiology & Biostatistics, University of Birmingham, B15 2TT.  
17  
18

19  
20  
21 Correspondence to: OI Martino [o.i.martino@bham.ac.uk](mailto:o.i.martino@bham.ac.uk)  
22  
23

24  
25 **Keywords:** Innovation; pharmaceutical; new drugs; drug launches; United Kingdom.  
26  
27  
28  
29  
30  
31  
32  
33  
34  
35  
36  
37  
38  
39  
40  
41  
42  
43  
44  
45  
46  
47  
48  
49  
50  
51  
52  
53  
54  
55  
56  
57  
58  
59  
60

## ABSTRACT

**Context:** There is wide concern that pharmaceutical innovation is declining. Reported trends suggest that fewer new drugs have been launched over recent decades, despite increasing investment into research and development.

**Objective:** To describe trends in new drugs launched from 1982 to 2011 and test the hypothesis that the rate of new drug introductions has declined over the study period.

**Design:** Retrospective observational study.

**Setting and data source:** Database of new preparations added annually to the British National Formulary (BNF).

**Main outcome measures:** The number of new drugs entered each year, including new chemical entities (NCEs) and new biologic drugs, based on first appearance in the BNF.

**Results:** There was no significant linear trend in the number of new drugs introduced into the UK from 1982 to 2011. Following a dip in the mid-1980s (11-12 NCEs/new biologics introduced annually from 1985 to 1987), there was a variable increase in numbers of new drugs introduced annually to a peak of 34 in 1997. This peak was followed by a decline to approximately 20 new drugs per year between 2003 and 2006, with variable rates thereafter. Sensitivity analyses show that the increasing trend between the mid-80s and 1997 peak, and the subsequent declining trend to 2009, when examined individually, were both statistically significant. Extending the timeline further back with existing published data shows an overall slight increase in new drug introductions of 0.16 per year over the entire 1971 to 2011 period.

**Conclusions:** The purported 'innovation dip' is an artefact of the time periods previously studied. Reports of declining innovation need to be considered in the context of their timescale and perspective.

## ARTICLE SUMMARY

### Article focus

- There is wide concern that pharmaceutical innovation is declining. Reported trends suggest that fewer new drugs have been launched over recent decades, despite increasing investment in R&D.

### Key messages

- Whilst there are dips and peaks during specific time periods, the longer-term trend contradicts the widely held view that pharmaceutical innovation is declining, suggesting that annual numbers of newly launched drugs may have increased since the early 1970s.
- It is important to take into account the start and end dates included in analyses when interpreting time trends.

### Strengths and limitations of this study

- This is the most up-to-date study of trends in the launch of new drugs in the UK, using 30 years of complete data. The results are consistent with data on US and worldwide drug launches.
- Although numbers of NCEs and new biologic agents launched are a useful indicator of trends in pharmaceutical innovation, they are not the sole metric. Our data do not differentiate between varying degrees of novelty or clinical importance, which may represent different levels of innovation.

## INTRODUCTION

Despite increasing pharmaceutical research and development (R&D) times, costs and spending,<sup>1-5</sup> there are concerns that these increasing efforts are not being reflected in the numbers of new drugs being brought to market. Indeed, it is widely reported that there has been a decline or dip in the rate of development of new drugs over recent decades.<sup>1;6-10</sup> Within the context of drug development, a new innovation is generally defined as the discovery, development and bringing to market of a new chemical entity (NCE)<sup>11</sup> defined as ‘an active ingredient that has never been marketed... in any form’.<sup>12</sup> These new entities may be relatively minor modifications of existing drugs or represent radical new breakthroughs. Much of the evidence for an ‘innovation dip’ comes from North America. Data from the United States Food & Drug Administration (FDA) show a downward trend in the number of NCEs introduced throughout the 1990s and at the start of the new millennium,<sup>13,14</sup> with the 18 new medicines approved in 2007 ‘the lowest figure in a quarter of a century’.<sup>1</sup> A decrease has also been noted in patented medicines granted market access in Canada between 1997 and 2008.<sup>15</sup> Worldwide data also indicate a decline in NCE introductions between 1982 and 2002/03;<sup>16,17</sup> however studies that include earlier decades suggest that this may be an artefact of a peak in 1996, with a return to historic levels thereafter.<sup>5;18,19</sup> More recent trends also show an increase in new biologic agents<sup>5;13;16;18</sup> and orphan products,<sup>16</sup> which suggests a shift in the focus of innovation. Papers focussing specifically on the United Kingdom (UK) report a decline in NCEs launched from 1960 to the late 1980s,<sup>2;20,21</sup> although the downward trend is considerably weakened by omitting the years 1960-63.<sup>21</sup> Numbers of NCEs authorised in the UK between 1972 and 1994 also show no consistent annual trend, although there was an increase in authorisations of new biological entities and products of biotechnology.<sup>22</sup> By contrast, numbers of all newly launched medicines, including new formulations of existing drugs and generic drugs, show no decline in new product introductions in the UK subsequent

1  
2  
3 to the implementation of the Medicines Act (1968) in 1971, though there had been a fall in  
4  
5 new drugs launched in the early 1960s following the thalidomide tragedy.<sup>21</sup> However, even  
6  
7 though there is disagreement on the crude rate of drug launch, it does at least seem certain  
8  
9 that the rate per R&D spend has declined. Scannell and colleagues calculated that the rate of  
10  
11 new drugs per billion dollars spent on R&D has halved approximately every 9 years since the  
12  
13 1950s.<sup>10</sup>

14  
15  
16  
17 We aimed to test the widely held belief that annual numbers of new drugs launched in the UK  
18  
19 have declined or are declining. New drugs include both NCEs and new biologic agents,  
20  
21 which are medicinal products created by biological processes rather than chemical synthesis.  
22  
23 New biologics include vaccines, blood products, allergenic extracts, somatic cells, gene  
24  
25 therapies, tissues, recombinant therapeutic proteins, or living cells used therapeutically.<sup>23</sup> We  
26  
27 primarily considered the period from 1982 to 2011, but also incorporated existing published  
28  
29 UK data<sup>2,20,21</sup> in order to consider the entire period from the implementation of the Medicines  
30  
31 Act (1968) in 1971.  
32  
33  
34  
35  
36  
37  
38

## 39 **METHODS**

### 40 41 **Data collection and classification of entries**

42  
43  
44 We obtained data on the numbers of new drugs (NCEs and new biologic agents) launched in  
45  
46 the UK each year from relevant editions of the British National Formulary (BNF). The BNF  
47  
48 lists all preparations available for prescribing and/or dispensing in the UK, including  
49  
50 prescription-only and over the counter medicines, not all of which are available on the  
51  
52 National Health Service (NHS). Information on the active ingredient for every item in the  
53  
54 'new preparations' section of each edition of the BNF from edition 3 in 1982 to 62 in 2011  
55  
56  
57  
58  
59  
60

1  
2  
3 was obtained and entered onto a database. As the BNF also includes non-drug products, these  
4  
5 were excluded (nutraceutical and medical foods, natural products, devices and diagnostic  
6  
7 products – definitions are given in appendix 1) leaving only drugs (NCEs, existing chemical  
8  
9 compounds, new salts or esters of existing chemical compounds, new biologic agents and  
10  
11 existing biologic agents). Different dosages of the same product (e.g. 5mg and 10mg tablets)  
12  
13 were counted once; different formulations of the same product, e.g. tablet and intramuscular  
14  
15 injection, were counted once if they contained the same active ingredients, and multiple times  
16  
17 if they contained different active ingredients. Different indications for the same product were  
18  
19 counted once.  
20  
21  
22

### 23 **Definition of new drugs**

24  
25  
26 Entries were classified as new (NCE or new biologic agent) by checking whether the drug  
27  
28 substance appeared in previous editions of the BNF. New formulations, generic versions and  
29  
30 new salts or esters of existing drugs were therefore not classified as new. Commercial  
31  
32 pharmaceutical databases (PharmaProjects V5.2, Informa Healthcare. and Adis R&D Insight,  
33  
34 Wolters Kluwer Pharma Solutions) were used to determine whether it was a new drug at the  
35  
36 date of UK launch. Where preparations could not be found in commercial pharmaceutical  
37  
38 databases, we undertook internet searches for scientific articles or patents relating to the  
39  
40 substances.  
41  
42  
43  
44

### 45 **Analysis**

46  
47  
48 Time trends in the numbers of new drugs introduced in the UK were analysed using linear  
49  
50 regression (SPSS v17.0, IBM). The primary analysis included all new drugs (NCEs and new  
51  
52 biologics) added to the BNF from 1982 to 2011, with a sub-analysis of the 12-year periods  
53  
54 pre-and post-1997. These time periods were selected to allow periods of equal length either  
55  
56 side of the 1997 peak previously identified in the published literature on worldwide NCE  
57  
58  
59  
60

1  
2  
3 launches.<sup>16</sup> The secondary analysis incorporated existing published UK data to include all  
4  
5 new drug introductions from 1971 to 2011. Data on NCE launches was originally reported by  
6  
7 Lis & Walker<sup>2</sup> using published sources including the BNF, the Monthly Index of Medical  
8  
9 Specialties (MIMS; Haymarket Group) and Scrip (Informa), up to 1987; this was extended up  
10  
11 to 1990 by the Centre for Medicines Research (CMR; now Centre for Medicines Research  
12  
13 International, The Thomson Corporation, London).<sup>20</sup> Where there was overlap (1982 to  
14  
15 1990), we took the average of the two values.  
16  
17  
18  
19  
20  
21

## 22 RESULTS

### 23 Analysis 1: New drugs launched from 1982 to 2011

24  
25 Figure 1 shows the number of new drugs launched annually in the UK from 1982 to 2011.  
26  
27 The mean number of new drugs introduced each year was 23.9 (SE 1.16). The lowest was 11  
28  
29 in 1985, and the highest was 34 in 1997 and again in 2010. These data suggest only a minor  
30  
31 upward linear trend in the annual numbers of new drugs launched, a result that was not  
32  
33 statistically significant (new drugs launched:  $y = -291 + 0.158 \times \text{year}$ ,  $r = 0.218$ ,  $p = 0.247$ ).  
34  
35  
36  
37  
38  
39

40 [Insert Figure 1 here]

### 41 Figure 1: New drugs launched in the UK from 1982 to 2011.

42  
43 The analysis was repeated for the 12-year periods pre- and post-1997 (Figure 2). For 1985 to  
44  
45 1997 there was a statistically significant upward trend (new drugs launched:  $y = -2.680 +$   
46  
47  $1.357 \times \text{year}$ ,  $r = 0.738$ ,  $p = 0.004$ ) while for 1997-2009 there was a statistically significant  
48  
49 downward trend (new drugs launched:  $y = 1567 - 0.769 \times \text{year}$ ,  $r = 0.640$ ,  $p = 0.018$ ).  
50  
51  
52  
53  
54

55 [Insert Figure 2 here]



1  
2  
3 **Figure 2: Comparison of trends in new drugs launched pre- and post-1997**  
4  
5  
6  
7  
8

9 **Analysis 2: New drugs launched from 1971 to 2011**

10  
11 This analysis used new drug data collected for this study from the BNF and NCE data from  
12 the CMR to extend our timeline back to 1971 (Figure 3). The mean number of new drugs  
13 introduced each year was 22.7 (SD 6.0). The lowest was 9 in 1985, and the highest was 34 in  
14 1997 and 2010. These data showed a modest upward linear trend in the annual numbers of  
15 new drugs launched between 1971 and 2011, a result that was statistically significant. In  
16 addition, the rate of annual increase was very similar to that seen in our data for the period  
17 1982-2011 (new drugs launched:  $y = -296 + 0.160 \times \text{year}$ ,  $r = 0.321$ ,  $p = 0.040$ ).  
18  
19  
20  
21  
22  
23  
24  
25  
26

27 [Insert Figure 3 here]  
28  
29

30 **Figure 3: New drugs launched in the UK from 1971 to 2011.**  
31  
32  
33  
34  
35  
36

37 **DISCUSSION**

38  
39 This is the most complete study of the number of new drug introductions in the UK, with 30  
40 years complete data on new products. The BNF includes all medicinal products available for  
41 dispensing in the UK and is updated every six months, providing an accurate and reliable  
42 account of new drugs launched in the UK each year. We found no statistically significant  
43 linear trend in new drug introductions between 1982 and 2011, however a statistically  
44 significant, though modest upward trend was observed after extending the data further to  
45 include the years 1971 to 1981<sup>20,21</sup>, contradicting the widely held view that the number of  
46 new medicines being launched is declining. Although there was a dip in new drug  
47  
48  
49  
50  
51  
52  
53  
54  
55  
56  
57  
58  
59  
60

1  
2  
3 introductions from 1997 to 2009, this was preceded by an increase from 1985 to 1997.  
4  
5 Additionally, the peak number of new drugs added to the BNF in 1997 was matched in 2010.  
6  
7  
8 The main limitation of the study is that it only describes trends in launch and cannot attribute  
9  
10 causes to changes; nor do we here disaggregate the data to explore different trends for  
11  
12 different treatments and different disease groups. We included all new drugs in the analysis,  
13  
14 but did not separate these into 'first-in-class' and 'me-too' drugs, which arguably represent  
15  
16 different levels of innovation and significance. It has been asserted that the true 'innovation  
17  
18 crisis' is due to the majority of new drugs being chemically similar to existing ones and  
19  
20 offering few therapeutic gains.<sup>19</sup> We also excluded new indications for existing drugs, which  
21  
22 in some cases can be as important as new drug launches.<sup>24</sup>  
23  
24

25  
26  
27 The findings are consistent with published reports of decreasing drug introductions, but only  
28  
29 during the mid-1990s to early 2000s.<sup>1;2;7;13;16,17;20</sup> In particular, there was consistency with the  
30  
31 CMR data for UK NCE launches up to 1990;<sup>20</sup> minor variations were likely to be due to  
32  
33 differences in the data sources used. However, the data do not show a longer term decline.  
34  
35 Clearly the start and end dates included in analyses can influence the interpretation of time  
36  
37 trends. Furthermore, the trend gradients for the present study data and the longer time trend  
38  
39 are very similar, only reaching statistical significance with sufficient data points. Taken  
40  
41 together they indicate a gradual increase in the annual number of new drug introductions  
42  
43 (approximately 0.16 new drugs per year).  
44  
45

46  
47  
48 Whilst the data do not show a reduction in absolute numbers of new drugs, it has been argued  
49  
50 that the pharmaceutical industry has become less productive, as the number of new drugs  
51  
52 launched has not increased relative to R&D time and expenditure or the availability of more  
53  
54 advanced technology.<sup>5;7;10;20;25</sup> The cost per new drug produced is estimated to have grown at  
55  
56 an annual compound rate of 13.5% since the 1950s.<sup>5</sup> This may be a cause for concern, and  
57  
58  
59  
60

1  
2  
3 certainly for disappointment in the pharmaceutical industry. Advances at the drug discovery  
4 stage (e.g. the introduction of high throughput screening in the late 1980s and early '90s) in  
5 theory means that more new compounds can be investigated more quickly and the  
6  
7 introduction of target-based drug discovery in the mid-1990s was a further promising  
8  
9 breakthrough. However, drug development times have been increasing; the time taken to  
10  
11 bring a new drug to market rose from approximately 3 years in 1960<sup>2</sup> to 12 years at the start  
12  
13 of the new millennium,<sup>3</sup> reflecting more rigorous processes and requirements, and higher  
14  
15 rejection rates in establishing the safety and efficacy of new drugs.<sup>7</sup> It has also been  
16  
17 suggested that we are approaching the scientific and economic limits of innovation,<sup>26</sup> so there  
18  
19 may be a ceiling limiting drug discovery.  
20  
21  
22  
23  
24

25  
26 The nature and context of pharmaceutical innovation have changed considerably over the last  
27  
28 half century. We now need a further exploration of the detail of the nature of the drugs  
29  
30 launched and of the events surrounding the innovation timeline to elucidate the factors  
31  
32 underpinning the apparent steady state.  
33  
34  
35  
36  
37

38 **Acknowledgements:** We thank Mr Nuredin Mohammed for advising on the analysis for this  
39  
40 study.  
41  
42

43 **Contributors:** All authors were involved in the study conception and design, contributed  
44  
45 substantially to the interpretation of the data and to subsequent drafts of the paper, and  
46  
47 approved the final version. OM collected and analysed the data, and produced the initial draft  
48  
49 of the paper. All authors had full access to all of the study data (including statistical reports  
50  
51 and tables), and can take responsibility for the integrity of the data and the accuracy of the  
52  
53 analysis. DW is guarantor.  
54  
55  
56  
57  
58  
59  
60

1  
2  
3 **Funding:** The study was undertaken as part of the research programme of the NIHR Horizon  
4 Scanning Centre (NIHR HSC). The NIHR HSC is funded by the National Institute for Health  
5 Research (NIHR). The NIHR had no role in the study design; in the collection, analysis, and  
6 interpretation of the data; in the preparation of the manuscript; or in the decision to submit the  
7 article for publication.  
8  
9

10  
11  
12  
13  
14 **Competing interests:** All authors have completed the Unified Competing Interest form at  
15 [www.icmje.org/coi\\_disclosure.pdf](http://www.icmje.org/coi_disclosure.pdf) (available on request from the corresponding author) and  
16 declare that (1) DW, OM, SS and AS have support from the National Institute for Health  
17 Research for the submitted work; (2) DW, OM, SS and AS have no relationships that might  
18 have an interest in the submitted work in the previous 3 years; (3) their spouses, partners, or  
19 children have no financial relationships that may be relevant to the submitted work; and (4)  
20 DW, OM, SS and AS have no non-financial interests that may be relevant to the submitted  
21 work.  
22  
23  
24  
25  
26  
27  
28  
29  
30  
31

32  
33 **Ethical approval:** Not required.  
34

35  
36 **Data sharing:** Please contact the corresponding author: [o.i.martino@bham.ac.uk](mailto:o.i.martino@bham.ac.uk)  
37  
38

39 **Copyright/licence for publication:** The Corresponding Author has the right to grant on  
40 behalf of all authors and does grant on behalf of all authors, a worldwide licence to the  
41 Publishers and its licensees in perpetuity, in all forms, formats and media (whether known  
42 now or created in the future), to i) publish, reproduce, distribute, display and store the  
43 Contribution, ii) translate the Contribution into other languages, create adaptations, reprints,  
44 include within collections and create summaries, extracts and/or, abstracts of the  
45 Contribution, iii) create any other derivative work(s) based on the Contribution, iv) to exploit  
46 all subsidiary rights in the Contribution, v) the inclusion of electronic links from the  
47  
48  
49  
50  
51  
52  
53  
54  
55  
56  
57  
58  
59  
60

1  
2  
3 Contribution to third party material where-ever it may be located; and, vi) licence any third  
4  
5 party to do any or all of the above.  
6  
7  
8  
9

## 10 REFERENCES

11  
12 1. Miller HI. Pharma innovation in critical condition. *Genetic Engineering & Biotechnology*  
13 *News*. 2009;29(21) [cited 08 Nov 2011]. Available from: [http://www.genengnews.com/gen-](http://www.genengnews.com/gen-articles/pharma-innovation-in-critical-condition/3115/)  
14 [articles/pharma-innovation-in-critical-condition/3115/](http://www.genengnews.com/gen-articles/pharma-innovation-in-critical-condition/3115/)  
15  
16  
17

18  
19  
20  
21 2. Lis Y, Walker SR. Novel medicines marketed in the UK 1960-1987. *Br J Clin Pharmacol*  
22  
23 1989;28:333-343.  
24  
25

26  
27  
28 3. DiMasi JA. The value of improving the productivity of the drug development process:  
29  
30 Faster times and better decisions. *Pharmacoeconomics* 2002;20(Suppl.):1-10.  
31  
32

33  
34  
35 4. DiMasi JA, Hansen RW, Grabowski HG. The price of innovation: New estimates of drug  
36  
37 development costs. *J Health Econ* 2003;22:151-85.  
38  
39

40  
41 5. Munos B. Lessons from 60 years of pharmaceutical innovation. *Nat Rev Drug Discov*  
42  
43 2009;8: 959-68.  
44  
45

46  
47  
48 6. Wurtman RJ, Bettiker RL. The slowing of treatment discovery, 1965-1995. *Nat Med*  
49  
50 1995;1: 1122-25.  
51  
52

53  
54  
55 7. US Food and Drug Administration (FDA). Innovation or stagnation: Challenge and  
56  
57 opportunity on the critical path to new medicinal products. 2004 [cited 2 Feb 2012].  
58  
59  
60

1  
2  
3 Available from:

4  
5 <http://www.fda.gov/ScienceResearch/SpecialTopics/CriticalPathInitiative/CriticalPathOpportunitiesReports/ucm077262.htm>  
6  
7  
8

9  
10  
11  
12 8. Charlton BG. Why medical research needs a new specialty of 'pure medical science'. *Clin Med* 2006;6:163-65.  
13  
14

15  
16  
17  
18 9. Lancet editorial. Where will new drugs come from? *Lancet* 2011;377:97  
19  
20 doi:10.1016/S0140-6736(11)60001-  
21  
22

23  
24  
25 10. Scannell JW, Blanckley A, Boldon H, Warrington B. Diagnosing the decline in  
26  
27 pharmaceutical R&D efficiency. *Nat Rev Drug Discov* 2012;11:191-200.  
28  
29

30  
31  
32 11. House of Commons. Health - Fourth Report.  
33  
34 <http://www.publications.parliament.uk/pa/cm200405/cmselect/cmhealth/42/4202.htm> 22  
35  
36 March 2005 (date accessed 22 Feb 2011).  
37  
38

39  
40 12. US Food and Drug Administration (FDA; 2012). Drugs@FDA glossary of terms.  
41  
42 <http://www.fda.gov/Drugs/InformationOnDrugs/ucm079436.htm> (date accessed 15 Aug  
43  
44 2012).  
45  
46

47  
48  
49 13. Cohen FJ. Macro trends in pharmaceutical innovation. *Nat Rev Drug Discov* 2005;4:78-  
50  
51 84.  
52  
53

54  
55 14. Debnath B, Al-Mawsawi LQ, Neamati N. Are we living in the end of the blockbuster era?  
56  
57 *Drug News Perspect* 2010;23(10):670-84.  
58  
59  
60

1  
2  
3  
4  
5 15. Canadian Agency for Drugs and Technologies in Health (CADTH). The economic value  
6 of innovative health technologies. CADTH, Feb 2011.  
7  
8

9  
10  
11 16. Grabowski HG, Wang YR. The quantity and quality of worldwide new drug  
12 introductions, 1982-2003. *Health Aff* 2006;25:452-60.  
13  
14

15  
16  
17 17. Lichtenberg FR. Pharmaceutical innovation and the burden of disease in developing and  
18 developed countries. 2005: Columbia University and the National Bureau of Economic  
19 Research.  
20  
21  
22

23  
24  
25 18. Schmid EF & Smith AF. Keynote review: Is declining innovation in the pharmaceutical  
26 industry a myth? *Drug Discov Today* 2005;10:1031-39.  
27  
28  
29

30  
31  
32 19. Light D, Lexchin J. Pharmaceutical R&D: What do we get for all that money? *BMJ*  
33 2012;345:22-25.  
34  
35  
36

37  
38  
39 20. Centre for Medicines Research. Twenty five new chemical entities launched in the UK in  
40 1990. *CMR News* 1991;9:4-8.  
41  
42  
43

44  
45  
46 21. Tansey IP, Armstrong NA, Walker SR. Trends in pharmaceutical innovation: The  
47 introduction of products on to the UK market, 1960-1989. *J Pharm Med* 1994;4:85-100.  
48  
49  
50

1  
2  
3 22. Jefferys DB, Leakey D, Lewis JA, Payne S, Rawlins MD. New active substances  
4 authorized in the United Kingdom between 1972 and 1994. *Br J Clin Pharmacol*  
5  
6 1998;45:151-56.  
7  
8

9  
10  
11 23. US Food and Drug Administration (FDA). Drugs@FDA Glossary of terms. Available  
12 from: <http://www.fda.gov/Drugs/InformationOnDrugs/ucm079436.htm#B>  
13  
14

15  
16  
17 24. Aronson JK. Drug development: more science, more education. *Br J Clin Pharmacol*  
18  
19 2005;59:377-8.  
20  
21

22  
23  
24 25. Sams-Dodd F. Target-based drug discovery: Is something wrong? *Drug Discov Today*  
25  
26 2005;10:139-47.  
27  
28

29  
30  
31 26. Huebner J. A possible declining trend for worldwide innovation. *Technol Forecast Soc*  
32  
33 *Change* 2005;72:980-86.  
34  
35



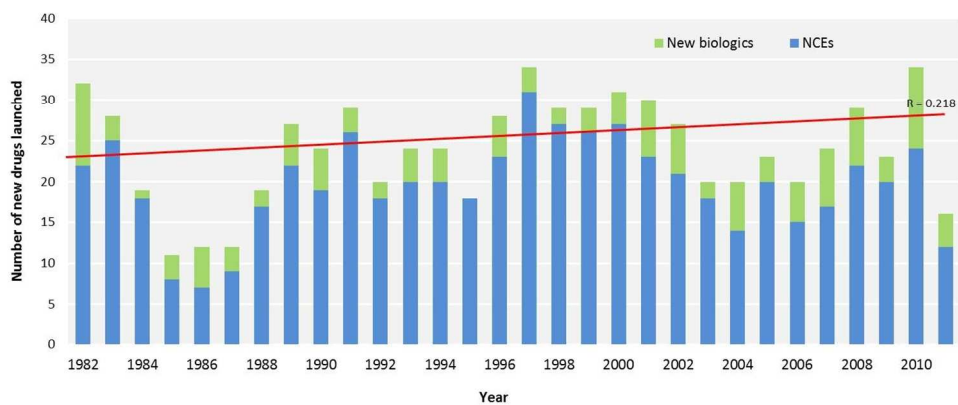

Figure 1: New drugs launched in the UK from 1982 to 2011.  
251x106mm (150 x 150 DPI)

Peer review only

1  
2  
3  
4  
5  
6  
7  
8  
9  
10  
11  
12  
13  
14  
15  
16  
17  
18  
19  
20  
21  
22  
23  
24  
25  
26  
27  
28  
29  
30  
31  
32  
33  
34  
35  
36  
37  
38  
39  
40  
41  
42  
43  
44  
45  
46  
47  
48  
49  
50  
51  
52  
53  
54  
55  
56  
57  
58  
59  
60

1  
2  
3  
4  
5  
6  
7  
8  
9  
10  
11  
12  
13  
14  
15  
16  
17  
18  
19  
20  
21  
22  
23  
24  
25  
26  
27  
28  
29  
30  
31  
32  
33  
34  
35  
36  
37  
38  
39  
40  
41  
42  
43  
44  
45  
46  
47  
48  
49  
50  
51  
52  
53  
54  
55  
56  
57  
58  
59  
60

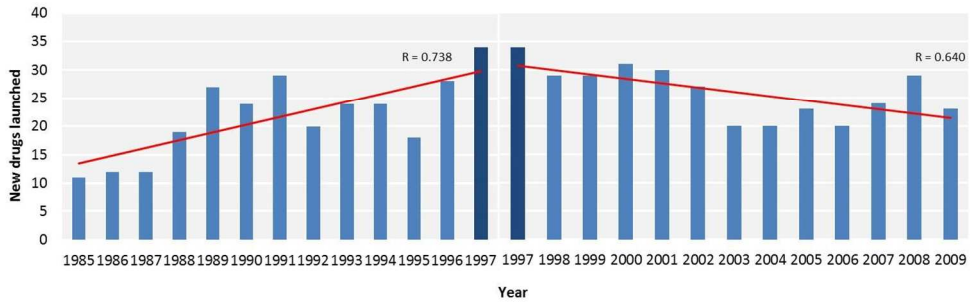

Figure 2: Comparison of trends in new drugs launched pre- and post-1997  
246x76mm (150 x 150 DPI)

peer review only

1  
2  
3  
4  
5  
6  
7  
8  
9  
10  
11  
12  
13  
14  
15  
16  
17  
18  
19  
20  
21  
22  
23  
24  
25  
26  
27  
28  
29  
30  
31  
32  
33  
34  
35  
36  
37  
38  
39  
40  
41  
42  
43  
44  
45  
46  
47  
48  
49  
50  
51  
52  
53  
54  
55  
56  
57  
58  
59  
60

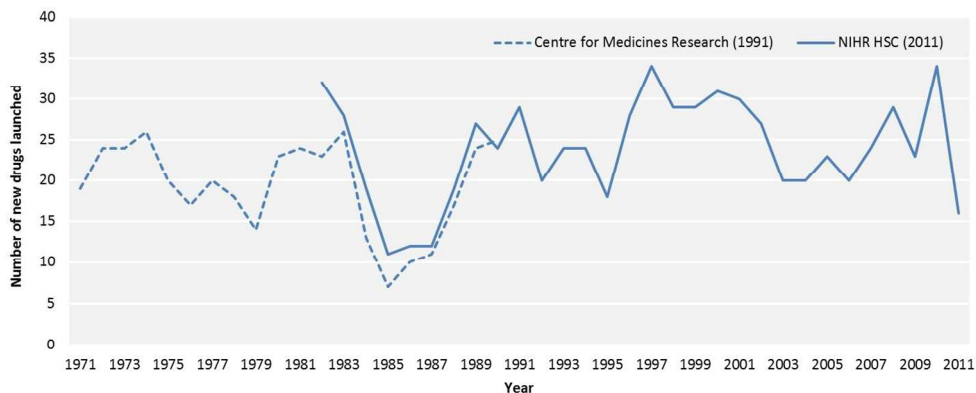

Figure 3: New drugs launched in the UK from 1971 to 2011.  
249x107mm (150 x 150 DPI)

Peer review only

## Appendix 1: Definitions and frequencies of new products by category, 1982 to 2011.

|                            | Category                       | No. (%)         | Definition                                                                                                                                                                                                                                                                                               |
|----------------------------|--------------------------------|-----------------|----------------------------------------------------------------------------------------------------------------------------------------------------------------------------------------------------------------------------------------------------------------------------------------------------------|
| New drugs & biologics      | NCEs                           | 589<br>(21.1)   | a) Appears in BNF for the first time <u>and</u><br>b) confirmed as being launched in the UK for the first time that year or late in the previous year, or may be defined as NCE on PharmaProjects.                                                                                                       |
|                            | New biologics                  | 127<br>(4.6)    | Appears in BNF for the first time. Includes biologic drugs; blood products; vaccines e.g. first appearance for a particular disease; different strain of existing vaccine; new preparation technique for existing vaccine; and insulins e.g. new source of insulin; new type; new preparation technique. |
| Existing drugs & biologics | New salts/esters               | 31<br>(1.1)     | Appears in BNF for the first time in that form, where previous forms of the compound have already been entered.                                                                                                                                                                                          |
|                            | Existing compounds             | 1,622<br>(58.2) | A drug substance that a) already appears in an earlier edition of the BNF, <u>or</u> b) is defined as <i>not</i> being a new chemical entity on Pharmaprojects at date of first launch.                                                                                                                  |
|                            | Existing biologics             | 217<br>(7.8)    | Appears in earlier edition of BNF. Includes combinations of existing vaccines; and combinations of existing types of insulin.                                                                                                                                                                            |
| Other substances           | Nutraceuticals & medical foods | 135<br>(4.8)    | Includes vitamins, dietary supplements, foods for special diets, nutritionally complete or incomplete formulas for intravenous nutrition, and oral rehydration products.                                                                                                                                 |
|                            | Natural products               | 22<br>(0.8)     | A substance that occurs naturally and has not been chemically manipulated – although mechanical manipulation may have taken place.                                                                                                                                                                       |
|                            | Devices                        | 34<br>(1.2)     | E.g. spacer devices, bandages. These have not been separated into new and existing technologies, as genuine innovation is more difficult to define with devices.                                                                                                                                         |
|                            | Diagnostic products            | 4<br>(0.1)      | E.g. tests for helicobacter pylori. These are products used for the detection and/or diagnosis of diseases rather than therapeutically.                                                                                                                                                                  |
|                            | Uncoded                        | 7<br>(0.3)      | An entry where no specific substances (active or otherwise) have been named, e.g. 'cleansing solution'.                                                                                                                                                                                                  |

## STROBE Statement—checklist of items that should be included in reports of observational studies

|                                   | Item No | Recommendation                                                                                                                                                                                                                                                                                                                                                                                                                                                                                                                                                                                                                                                                                   |
|-----------------------------------|---------|--------------------------------------------------------------------------------------------------------------------------------------------------------------------------------------------------------------------------------------------------------------------------------------------------------------------------------------------------------------------------------------------------------------------------------------------------------------------------------------------------------------------------------------------------------------------------------------------------------------------------------------------------------------------------------------------------|
| <b>Title and abstract</b>         | 1       | (a) Indicate the study's design with a commonly used term in the title or the abstract <b>PP.1-2</b><br>(b) Provide in the abstract an informative and balanced summary of what was done and what was found <b>P.2</b>                                                                                                                                                                                                                                                                                                                                                                                                                                                                           |
| <b>Introduction</b>               |         |                                                                                                                                                                                                                                                                                                                                                                                                                                                                                                                                                                                                                                                                                                  |
| Background/rationale              | 2       | Explain the scientific background and rationale for the investigation being reported <b>PP.4-5</b>                                                                                                                                                                                                                                                                                                                                                                                                                                                                                                                                                                                               |
| Objectives                        | 3       | State specific objectives, including any prespecified hypotheses <b>P.5</b>                                                                                                                                                                                                                                                                                                                                                                                                                                                                                                                                                                                                                      |
| <b>Methods</b>                    |         |                                                                                                                                                                                                                                                                                                                                                                                                                                                                                                                                                                                                                                                                                                  |
| Study design                      | 4       | Present key elements of study design early in the paper <b>P.5</b>                                                                                                                                                                                                                                                                                                                                                                                                                                                                                                                                                                                                                               |
| Setting                           | 5       | Describe the setting, locations, and relevant dates, including periods of recruitment, exposure, follow-up, and data collection                                                                                                                                                                                                                                                                                                                                                                                                                                                                                                                                                                  |
| Participants<br>N/A               | 6       | (a) <i>Cohort study</i> —Give the eligibility criteria, and the sources and methods of selection of participants. Describe methods of follow-up<br><i>Case-control study</i> —Give the eligibility criteria, and the sources and methods of case ascertainment and control selection. Give the rationale for the choice of cases and controls<br><i>Cross-sectional study</i> —Give the eligibility criteria, and the sources and methods of selection of participants<br>(b) <i>Cohort study</i> —For matched studies, give matching criteria and number of exposed and unexposed<br><i>Case-control study</i> —For matched studies, give matching criteria and the number of controls per case |
| Variables                         | 7       | Clearly define all outcomes, exposures, predictors, potential confounders, and effect modifiers. Give diagnostic criteria, if applicable <b>PP.5-6</b>                                                                                                                                                                                                                                                                                                                                                                                                                                                                                                                                           |
| Data sources/<br>measurement      | 8*      | For each variable of interest, give sources of data and details of methods of assessment (measurement). Describe comparability of assessment methods if there is more than one group <b>PP.5-6</b>                                                                                                                                                                                                                                                                                                                                                                                                                                                                                               |
| Bias                              | 9       | Describe any efforts to address potential sources of bias <b>N/A</b>                                                                                                                                                                                                                                                                                                                                                                                                                                                                                                                                                                                                                             |
| Study size                        | 10      | Explain how the study size was arrived at <b>PP.5-6</b>                                                                                                                                                                                                                                                                                                                                                                                                                                                                                                                                                                                                                                          |
| Quantitative variables            | 11      | Explain how quantitative variables were handled in the analyses. If applicable, describe which groupings were chosen and why <b>P.6</b>                                                                                                                                                                                                                                                                                                                                                                                                                                                                                                                                                          |
| Statistical methods<br><b>P.6</b> | 12      | (a) Describe all statistical methods, including those used to control for confounding<br>(b) Describe any methods used to examine subgroups and interactions<br>(c) Explain how missing data were addressed<br>(d) <i>Cohort study</i> —If applicable, explain how loss to follow-up was addressed<br><i>Case-control study</i> —If applicable, explain how matching of cases and controls was addressed<br><i>Cross-sectional study</i> —If applicable, describe analytical methods taking account of sampling strategy<br>(e) Describe any sensitivity analyses                                                                                                                                |

Continued on next page

**Results**

|                          |     |                                                                                                                                                                                                                                                                                                                                                                                                               |
|--------------------------|-----|---------------------------------------------------------------------------------------------------------------------------------------------------------------------------------------------------------------------------------------------------------------------------------------------------------------------------------------------------------------------------------------------------------------|
| Participants<br>N/A      | 13* | (a) Report numbers of individuals at each stage of study—eg numbers potentially eligible, examined for eligibility, confirmed eligible, included in the study, completing follow-up, and analysed<br>(b) Give reasons for non-participation at each stage<br>(c) Consider use of a flow diagram                                                                                                               |
| Descriptive data<br>P.7  | 14* | (a) Give characteristics of study participants (eg demographic, clinical, social) and information on exposures and potential confounders<br>(b) Indicate number of participants with missing data for each variable of interest<br>(c) <i>Cohort study</i> —Summarise follow-up time (eg, average and total amount)                                                                                           |
| Outcome data<br>P.7      | 15* | <i>Cohort study</i> —Report numbers of outcome events or summary measures over time<br><i>Case-control study</i> —Report numbers in each exposure category, or summary measures of exposure<br><i>Cross-sectional study</i> —Report numbers of outcome events or summary measures                                                                                                                             |
| Main results<br>P.7      | 16  | (a) Give unadjusted estimates and, if applicable, confounder-adjusted estimates and their precision (eg, 95% confidence interval). Make clear which confounders were adjusted for and why they were included<br>(b) Report category boundaries when continuous variables were categorized<br>(c) If relevant, consider translating estimates of relative risk into absolute risk for a meaningful time period |
| Other analyses<br>PP.7-8 | 17  | Report other analyses done—eg analyses of subgroups and interactions, and sensitivity analyses                                                                                                                                                                                                                                                                                                                |

**Discussion**

|                  |    |                                                                                                                                                                                           |
|------------------|----|-------------------------------------------------------------------------------------------------------------------------------------------------------------------------------------------|
| Key results      | 18 | Summarise key results with reference to study objectives <b>P.8-9</b>                                                                                                                     |
| Limitations      | 19 | Discuss limitations of the study, taking into account sources of potential bias or imprecision. Discuss both direction and magnitude of any potential bias <b>PP.9-10</b>                 |
| Interpretation   | 20 | Give a cautious overall interpretation of results considering objectives, limitations, multiplicity of analyses, results from similar studies, and other relevant evidence <b>PP.9-10</b> |
| Generalisability | 21 | Discuss the generalisability (external validity) of the study results <b>P.9-10</b>                                                                                                       |

**Other information**

|         |    |                                                                                                                                                                           |
|---------|----|---------------------------------------------------------------------------------------------------------------------------------------------------------------------------|
| Funding | 22 | Give the source of funding and the role of the funders for the present study and, if applicable, for the original study on which the present article is based <b>P.11</b> |
|---------|----|---------------------------------------------------------------------------------------------------------------------------------------------------------------------------|

\*Give information separately for cases and controls in case-control studies and, if applicable, for exposed and unexposed groups in cohort and cross-sectional studies.

**Note:** An Explanation and Elaboration article discusses each checklist item and gives methodological background and published examples of transparent reporting. The STROBE checklist is best used in conjunction with this article (freely available on the Web sites of PLoS Medicine at <http://www.plosmedicine.org/>, Annals of Internal Medicine at <http://www.annals.org/>, and Epidemiology at <http://www.epidem.com/>). Information on the STROBE Initiative is available at [www.strobe-statement.org](http://www.strobe-statement.org).



**Declines in new drug launches: myth or reality?  
Retrospective observational study using 30 years of data  
from the United Kingdom.**

|                                 |                                                                                                                                                                                                                                                                                                                                                                                                                                                                   |
|---------------------------------|-------------------------------------------------------------------------------------------------------------------------------------------------------------------------------------------------------------------------------------------------------------------------------------------------------------------------------------------------------------------------------------------------------------------------------------------------------------------|
| Journal:                        | <i>BMJ Open</i>                                                                                                                                                                                                                                                                                                                                                                                                                                                   |
| Manuscript ID:                  | bmjopen-2012-002088.R1                                                                                                                                                                                                                                                                                                                                                                                                                                            |
| Article Type:                   | Research                                                                                                                                                                                                                                                                                                                                                                                                                                                          |
| Date Submitted by the Author:   | 06-Nov-2012                                                                                                                                                                                                                                                                                                                                                                                                                                                       |
| Complete List of Authors:       | Ward, Derek; University of Birmingham, NIHR Horizon Scanning Centre; Public Health, Epidemiology and Biostatistics<br>Martino, Orsolina; University of Birmingham, NIHR Horizon Scanning Centre; Public Health, Epidemiology and Biostatistics<br>Simpson, Sue; University of Birmingham, NIHR Horizon Scanning Centre; Public Health, Epidemiology and Biostatistics<br>Stevens, Andrew; University of Birmingham, Public Health, Epidemiology and Biostatistics |
| <b>Primary Subject Heading</b>: | Health services research                                                                                                                                                                                                                                                                                                                                                                                                                                          |
| Secondary Subject Heading:      | Pharmacology and therapeutics                                                                                                                                                                                                                                                                                                                                                                                                                                     |
| Keywords:                       | Innovation, Pharmaceutical, New drugs, Drug launches, United Kingdom                                                                                                                                                                                                                                                                                                                                                                                              |
|                                 |                                                                                                                                                                                                                                                                                                                                                                                                                                                                   |

SCHOLARONE™  
Manuscripts

1  
2  
3 **Decline in new drug launches: myth or reality? Retrospective observational**  
4  
5 **study using 30 years of data from the United Kingdom.**  
6  
7

8  
9 Derek J Ward, clinical senior lecturer,<sup>1</sup> Orsolina I Martino, research fellow,<sup>1</sup> Sue Simpson,  
10  
11 research fellow,<sup>1</sup> Andrew Stevens, professor of public health<sup>2</sup>  
12

13  
14 <sup>1</sup> NIHR Horizon Scanning Centre, University of Birmingham, B15 2SQ.  
15

16 <sup>2</sup> Public Health, Epidemiology & Biostatistics, University of Birmingham, B15 2TT.  
17  
18

19  
20  
21 Correspondence to: OI Martino [o.i.martino@bham.ac.uk](mailto:o.i.martino@bham.ac.uk)  
22  
23

24  
25 **Keywords:** Innovation; pharmaceutical; new drugs; drug launches; United Kingdom.  
26  
27  
28  
29  
30  
31  
32  
33  
34  
35  
36  
37  
38  
39  
40  
41  
42  
43  
44  
45  
46  
47  
48  
49  
50  
51  
52  
53  
54  
55  
56  
57  
58  
59  
60



## ABSTRACT

**Background:** There is wide concern that pharmaceutical innovation is declining. Reported trends suggest that fewer new drugs have been launched over recent decades, despite increasing investment into research and development.

**Objective:** To describe trends in new drugs launched in the UK from 1982 to 2011 and test the hypothesis that the rate of new drug introductions has declined over the study period.

**Design:** Retrospective observational study.

**Setting and data source:** Database of new preparations added annually to the British National Formulary (BNF).

**Main outcome measures:** The number of new drugs entered each year, including new chemical entities (NCEs) and new biologic drugs, based on first appearance in the BNF.

**Results:** There was no significant linear trend in the number of new drugs introduced into the UK from 1982 to 2011. Following a dip in the mid-1980s (11-12 NCEs/new biologics introduced annually from 1985 to 1987), there was a variable increase in numbers of new drugs introduced annually to a peak of 34 in 1997. This peak was followed by a decline to approximately 20 new drugs per year between 2003 and 2006, and another peak in 2010. Extending the timeline further back with existing published data shows an overall slight increase in new drug introductions of 0.16 per year over the entire 1971 to 2011 period.

**Conclusions:** The purported 'innovation dip' is an artefact of the time periods previously studied. Reports of declining innovation need to be considered in the context of their timescale and perspective.

## ARTICLE SUMMARY

**Article focus**

- There is wide concern that pharmaceutical innovation is declining. Reported trends suggest that fewer new drugs have been launched over recent decades, despite increasing investment in R&D.

**Key messages**

- Whilst there are dips and peaks during specific time periods, the longer-term trend contradicts the widely held view that pharmaceutical innovation is declining, suggesting that annual numbers of newly launched drugs may have increased since the early 1970s.
- It is important to take into account the start and end dates included in analyses when interpreting time trends.

**Strengths and limitations of this study**

- This is the most up-to-date study of trends in the launch of new drugs in the UK, using 30 years of complete data. The results are consistent with data on US and worldwide drug launches.
- Although numbers of NCEs and new biologic agents launched are a useful indicator of trends in pharmaceutical innovation, they are not the sole metric. Our data do not differentiate between varying degrees of novelty or clinical importance, which may represent different levels of innovation.

## INTRODUCTION

Despite increasing pharmaceutical research and development (R&D) times, costs and spending,<sup>1-5</sup> there are concerns that these increasing efforts are not being reflected in the numbers of new drugs being brought to market. Indeed, it is widely reported that there has been a decline or dip in the rate of development of new drugs over recent decades.<sup>1;6-10</sup>

Within the context of drug development, a new innovation is generally defined as the discovery, development and bringing to market of a new chemical entity (NCE);<sup>11</sup> ‘an active ingredient that has never been marketed... in any form’.<sup>12</sup> These new entities may be relatively minor modifications of existing drugs or represent radical new breakthroughs.

Much of the evidence for an ‘innovation dip’ comes from North America. Data from the United States (US) Food & Drug Administration (FDA) show a downward trend in the number of NCEs introduced throughout the 1990s and at the start of the new millennium,<sup>13,14</sup> with the 18 new medicines approved in 2007 ‘the lowest figure in a quarter of a century’.<sup>1</sup> A decrease has also been noted in patented medicines granted market access in Canada between 1997 and 2008.<sup>15</sup> Worldwide data also indicate a decline in NCE introductions between 1982 and 2002/03,<sup>16,17</sup> however studies that include earlier decades suggest that this may be an artefact of a peak in 1996, with a return to historic levels thereafter.<sup>5;18-20</sup> More recent trends also show an increase in new biologic agents<sup>5;13;16;18</sup> and orphan products,<sup>16</sup> which suggests a shift in the focus of innovation. Papers focussing specifically on the United Kingdom (UK) report a decline in NCEs launched from 1960 to the late 1980s,<sup>2;21,22</sup> although the downward trend is considerably weakened by omitting the years 1960-63.<sup>22</sup> Numbers of NCEs authorised in the UK between 1972 and 1994 also show no consistent annual trend, although there was an increase in authorisations of new biological entities and products of biotechnology.<sup>23</sup> By contrast, numbers of all newly launched medicines, including new

1  
2  
3 formulations of existing drugs and generic drugs, show no decline in new product  
4  
5 introductions in the UK subsequent to the implementation of the Medicines Act 1968 in  
6  
7 1971, though there had been a fall in new drugs launched in the early 1960s following the  
8  
9 thalidomide tragedy.<sup>22</sup> However, even though there is disagreement on the crude rate of drug  
10  
11 launch, it does at least seem certain that the rate per R&D spend has declined. Scannell and  
12  
13 colleagues calculated that the rate of new drugs per billion dollars spent on R&D (adjusted  
14  
15 for inflation) has halved approximately every 9 years since the 1950s.<sup>10</sup>  
16  
17  
18

19 We aimed to test the widely held belief that annual numbers of new drugs launched in the UK  
20  
21 have declined or are declining. After the US, the UK is the next largest source of NCE  
22  
23 development, accounting for 10.4% of pharmaceutical innovation worldwide.<sup>24</sup> It is  
24  
25 recognised that prior to the implementation of the Medicines Act 1968 there was no formal  
26  
27 licensing of medicines in the UK, other than those covered by the Therapeutic Substances  
28  
29 Act 1956;<sup>2</sup> earlier evidence suggests that the Medicines Act 1968 would have slowed or even  
30  
31 prevented some product introductions from the early 1970s onwards.<sup>22</sup> New drugs include  
32  
33 both NCEs and new biologic agents, which are medicinal products created by biological  
34  
35 processes rather than chemical synthesis. New biologics include vaccines, blood products,  
36  
37 allergenic extracts, somatic cells, gene therapies, tissues, recombinant therapeutic proteins, or  
38  
39 living cells used therapeutically.<sup>25</sup> We primarily considered the period from 1982 to 2011, but  
40  
41 also incorporated existing published UK data<sup>2,21,22</sup> in order to consider the entire period from  
42  
43 the implementation of the Medicines Act 1968 in 1971.  
44  
45  
46  
47  
48  
49  
50  
51  
52  
53  
54  
55  
56  
57  
58  
59  
60

## METHODS

### Data collection and classification of entries

We obtained data on the numbers of new drugs (NCEs and new biologic agents) launched in the UK each year from relevant editions of the British National Formulary (BNF). The BNF lists all preparations available for prescribing and/or dispensing in the UK, including prescription-only and over the counter medicines, not all of which are available on the National Health Service (NHS). Information on the active ingredient for every item in the 'new preparations' section of each edition of the BNF from edition 3 in 1982 to edition 62 in 2011 was obtained and entered onto a database. As the BNF also includes non-drug products, these were excluded (nutraceutical and medical foods, natural products, devices and diagnostic products – definitions are given in appendix 1) leaving only drugs (NCEs, existing chemical compounds, new salts or esters of existing chemical compounds, new biologic agents and existing biologic agents). Different dosages of the same product (e.g. 5mg and 10mg tablets) were counted once; different formulations of the same product, e.g. tablet and intramuscular injection, were counted once if they contained the same active ingredients, and multiple times if they contained different active ingredients. Different indications for the same product were counted once.

### Definition of new drugs

Entries were classified as new (NCE or new biologic agent) by checking whether the drug substance appeared in previous editions of the BNF. New formulations, generic versions and new salts or esters of existing drugs were therefore not classified as new. Commercial pharmaceutical databases (PharmaProjects V5.2, Informa Healthcare. and Adis R&D Insight, Wolters Kluwer Pharma Solutions) were also used to determine whether a substance was a new drug at the date of UK launch. Where preparations could not be found in commercial

1  
2  
3 pharmaceutical databases, we undertook internet searches for scientific articles or patents  
4  
5 relating to the substances.  
6  
7

## 8 **Analysis**

9  
10  
11 Time trends in the numbers of new drugs introduced in the UK were analysed using linear  
12 regression (SPSS v17.0, IBM). Year (1971 to 2011) was treated as a continuous variable. The  
13 primary analysis included all new drugs (NCEs and new biologics) added to the BNF from  
14 1982 to 2011, with a sub-analysis of the 1997-2006 decade for comparison with the published  
15 literature on worldwide NCE launches.<sup>16</sup> Analysis of covariance (ANCOVA) was used to test  
16 for homogeneity of regression before and after the 1997 peak, with number of new drugs as  
17 the dependent variable and year as the covariate, grouped by the periods either side of the  
18 peak (1982-1997 and 1998-2011). The secondary analysis incorporated existing published  
19 UK data to include all new drug introductions from 1971 to 2011. Data on NCE launches  
20 were originally reported by Lis & Walker<sup>2</sup> using published sources including the BNF, the  
21 Monthly Index of Medical Specialties (MIMS; Haymarket Group) and Scrip (Informa), up to  
22 1987; this was extended up to 1990 by the Centre for Medicines Research (CMR; now Centre  
23 for Medicines Research International, The Thomson Corporation, London).<sup>21</sup> Where there  
24 was overlap (1982 to 1990), we took the average of the two values.  
25  
26  
27  
28  
29  
30  
31  
32  
33  
34  
35  
36  
37  
38  
39  
40  
41  
42  
43  
44  
45

## 46 **RESULTS**

### 47 **Analysis 1: New drugs launched from 1982 to 2011**

48  
49 Figure 1 shows the number of new drugs launched annually in the UK from 1982 to 2011.  
50  
51  
52 The mean number of new drugs introduced each year was 23.9 (SE 1.16). The lowest was 11  
53  
54  
55 in 1985, and the highest was 34 in 1997 and again in 2010. These data suggest only a minor  
56  
57  
58  
59  
60

1  
2  
3 upward linear trend in the annual numbers of new drugs launched, a result that was not  
4  
5 statistically significant (new drugs launched:  $y = -291 + 0.16 \times \text{year}$ ,  $r = 0.22$ ,  $p = 0.25$ ).  
6  
7

8 [Insert Figure 1 here]  
9

10  
11 **Figure 1: New drugs launched in the UK from 1982 to 2011.**  
12

13  
14 A sub-analysis for the 1997-2006 decade (Figure 2) revealed a statistically significant  
15  
16 downward trend (new drugs launched:  $y = 3047 - 1.51 \times \text{year}$ ,  $r = 0.89$ ,  $p = 0.001$ ). ANCOVA  
17  
18 showed no significant interaction between year and period ( $F_{1,26} = 2.68$ ,  $p = 0.11$ ), indicating  
19  
20 equality of regression slopes pre- and post-1997. There was significant positive first-order  
21  
22 autocorrelation in the residuals (Durbin-Watson statistic = 1.09,  $p < 0.01$ ).  
23  
24

25  
26 [Insert Figure 2 here]  
27

28  
29 **Figure 2: New drugs launched between 1997 and 2006.**  
30  
31

32  
33  
34  
35 **Analysis 2: New drugs launched from 1971 to 2011**  
36

37 This analysis used new drug data collected for this study from the BNF and NCE data from  
38  
39 the CMR to extend our timeline back to 1971 (Figure 3). The mean number of new drugs  
40  
41 introduced each year was 22.7 (SD 6.0). The lowest was 9 in 1985, and the highest was 34 in  
42  
43 1997 and 2010. These data showed a modest upward linear trend in the annual numbers of  
44  
45 new drugs launched between 1971 and 2011, a result that was statistically significant. In  
46  
47 addition, the rate of annual increase was very similar to that seen in our data for the period  
48  
49 1982-2011 (new drugs launched:  $y = -296 + 0.16 \times \text{year}$ ,  $r = 0.32$ ,  $p = 0.04$ ). Again,  
50  
51 ANCOVA revealed no interaction between year and period, indicating equality of regression  
52  
53 slopes pre- and post-1997 ( $F_{1,37} = 2.35$ ,  $p = 0.13$ ). There was significant positive first-order  
54  
55 autocorrelation in the residuals (Durbin-Watson statistic = 1.10,  $p < 0.01$ ).  
56  
57  
58  
59  
60

1  
2  
3 [Insert Figure 3 here]  
4  
5

6 **Figure 3: New drugs launched in the UK from 1971 to 2011.**  
7  
8  
9

## 10 11 12 **DISCUSSION** 13

14  
15 This is the most complete study of the number of new drug introductions in the UK, with 30  
16 years complete data on new products. The BNF includes all medicinal products available for  
17 dispensing in the UK and is updated every six months, providing an accurate and reliable  
18 account of new drugs launched in the UK each year. We found no statistically significant  
19 linear trend in new drug introductions between 1982 and 2011, however a statistically  
20 significant, though modest upward trend was observed after extending the data further to  
21 include the years 1971 to 1981,<sup>21,22</sup> contradicting the widely held view that the number of  
22 new medicines being launched is declining. Although there was indeed a dip in new drug  
23 introductions during the decade from 1997 to 2006, this was largely an artefact of a peak in  
24 1997, which was itself preceded by an unusually low number of launches in 1985-87.  
25  
26

27  
28 Additionally, the peak number of new drugs added to the BNF in 1997 was matched in 2010.  
29  
30

31  
32 The main limitation of the study is that it only describes trends in launch and cannot attribute  
33 causes to changes; nor do we here disaggregate the data to explore different trends for  
34 different treatments and different disease groups. There are nonetheless key events during the  
35 timeline that should be noted, as they may provide some insight into the observed trends.  
36  
37

38  
39 Despite the implementation of the Medicines Act 1968, it has been argued that the  
40 thalidomide crisis did not lead to more rigorous drug regulation; instead, there was a culture  
41 of 'reluctant regulation' which was linked to trust and optimism concerning the safety of new  
42 drugs, and avoiding potential conflicts with industry interest.<sup>26,27</sup> This arrangement was  
43  
44  
45  
46  
47  
48  
49  
50  
51  
52  
53  
54  
55  
56  
57  
58  
59  
60



1  
2  
3 disrupted by the practolol disaster of the early 1980s, which resulted in approximately 2,450  
4 reports of adverse reactions including 40 deaths,<sup>26</sup> and the withdrawal of four NCEs  
5  
6 worldwide in 1983 due to safety concerns<sup>2,28</sup> and may partly explain the low number of new  
7 drugs launched during 1985-1987.<sup>27</sup> The European Agency for the Evaluation of Medicinal  
8 Products (European Medicines Agency [EMA] since 2004) was set up with funding from the  
9 European Union and the pharmaceutical industry to integrate the work of existing national  
10 medicine regulatory bodies, and may also have impacted upon new drug approvals and  
11 launches following its inception in 1995. Changes in drug review processes may partially  
12 account for the peak in new drugs launched in the mid-1990s, and the generally higher levels  
13 observed in the latter half of the timeline. For example, faster approval times by the FDA  
14 following the global AIDS epidemic<sup>29</sup> and the introduction of the Prescription Drug User Fee  
15 Acts from 1992<sup>30</sup> may have influenced worldwide marketing approaches, including decisions  
16 to seek new drug licenses; while in Europe, a new review system implemented by the EMA  
17 in 2006 attempted to reduce approval times for innovative drugs offering significant clinical  
18 benefit.<sup>31</sup> Increased innovation could also be driven by policy, such as the EU Regulation on  
19 orphan medicinal products, which exists to stimulate research and development into drugs for  
20 rare conditions.<sup>31,32</sup>

21  
22  
23  
24  
25  
26  
27  
28  
29  
30  
31  
32  
33  
34  
35  
36  
37  
38  
39  
40  
41 We included all new drugs in the analysis, but did not separate these into ‘first-in-class’ and  
42 ‘me-too’ drugs, which arguably represent different levels of innovation and significance. It  
43 has been asserted that the true ‘innovation crisis’ is due to the majority of new drugs being  
44 chemically similar to existing ones and offering few therapeutic gains.<sup>19</sup> Yet data from the  
45 FDA show that the percentage of priority products (i.e. those that appear to represent an  
46 advance over available therapies)<sup>12</sup> reached a 30-year high during 2005-09, at almost 50% of  
47 total new drug approvals.<sup>20</sup> We also excluded incremental innovation to existing drugs, such  
48 as new indications and formulations, which in some cases can be as important as new drug  
49  
50  
51  
52  
53  
54  
55  
56  
57  
58  
59  
60

1  
2  
3 launches in terms of clinical and economic benefits.<sup>33,34</sup> Berndt and colleagues demonstrated  
4  
5 an overall increase in the number of supplementary new drug approvals for new indications  
6  
7 for three major drug classes (ACE inhibitors, histamine H<sub>2</sub>-antagonists/proton-pump  
8  
9 inhibitors, and selective serotonin/norepinephrine reuptake inhibitors) since the early 1990s,  
10  
11 suggesting that the value of incremental innovation may be overlooked when assessing  
12  
13 productivity trends for pharmaceutical R&D.<sup>34</sup> It should nevertheless be noted that there is no  
14  
15 standard framework for assessing the therapeutic value of drugs developed over such a broad  
16  
17 time frame and variety of classes.<sup>24</sup>  
18  
19

20  
21 The findings are consistent with published reports of decreasing drug introductions, but only  
22  
23 during the mid-1990s to early 2000s.<sup>1;2;7;13;16;17;21</sup> In particular, there was consistency with the  
24  
25 CMR data for UK NCE launches up to 1990;<sup>21</sup> minor variations were likely to be due to  
26  
27 differences in the data sources used. However, the data do not show a longer term decline,  
28  
29 but instead support more recent analyses suggesting a return to historic levels following a  
30  
31 peak around 1997.<sup>5;18-20</sup> Clearly the start and end dates included in analyses can influence the  
32  
33 interpretation of time trends. Furthermore, the trend gradients for the present study data and  
34  
35 the longer time trend are very similar, only reaching statistical significance with sufficient  
36  
37 data points. Taken together they indicate a gradual increase in the annual number of new drug  
38  
39 introductions (approximately 0.16 new drugs per year). This is in line with a recent  
40  
41 forecasting analysis, which predicts an increase in new drug launches in the 2012-2016  
42  
43 period compared with the previous five years to 2011.<sup>35</sup>  
44  
45  
46  
47  
48

49 Whilst the data do not show a reduction in absolute numbers of new drugs, it has been argued  
50  
51 that the pharmaceutical industry has become less productive, as the number of new drugs  
52  
53 launched has not increased relative to R&D time and expenditure or the availability of more  
54  
55 advanced technology.<sup>5;7;10;21;36</sup> The cost per new drug produced is estimated to have grown at  
56  
57 an annual compound rate of 13.4% since the 1950s; adjusting for inflation (3.7% per year)  
58  
59  
60

1  
2  
3 and other cost increases such as regulation (8.3% per year) increases the estimated cost per  
4  
5 new drug considerably.<sup>5</sup> This may be a cause for concern, and certainly for disappointment in  
6  
7 the pharmaceutical industry. Advances at the drug discovery stage (e.g. the introduction of  
8  
9 high throughput screening in the late 1980s and early '90s) in theory means that more new  
10  
11 compounds can be investigated more quickly and the introduction of target-based drug  
12  
13 discovery in the mid-1990s was a further promising breakthrough. However, drug  
14  
15 development times have been increasing; the time taken to bring a new drug to market rose  
16  
17 from approximately 3 years in 1960<sup>2</sup> to 12 years at the start of the new millennium.<sup>3</sup>

20 Notwithstanding the EMA's (and FDA's) attempts to accelerate approvals these may reflect  
21  
22 more rigorous processes and requirements, and higher rejection rates in establishing the  
23  
24 safety and efficacy of new drugs.<sup>7</sup> It has also been suggested that we are approaching the  
25  
26 scientific and economic limits of innovation,<sup>37</sup> so there may be a ceiling limiting drug  
27  
28 discovery.  
29  
30

31  
32 The nature and context of pharmaceutical innovation have changed considerably over the last  
33  
34 half century. We now need a further exploration of the detail of the nature of the drugs  
35  
36 launched and of the events surrounding the innovation timeline to elucidate the factors  
37  
38 underpinning the apparent steady state.  
39  
40  
41  
42  
43  
44

45 **Acknowledgements:** We thank Mr Nuredin Mohammed for advising on the analysis for this  
46  
47 study.  
48

49  
50 **Contributors:** All authors were involved in the study conception and design, contributed  
51  
52 substantially to the interpretation of the data and to subsequent drafts of the paper, and  
53  
54 approved the final version. OM collected and analysed the data, and produced the initial draft  
55  
56 of the paper. All authors had full access to all of the study data (including statistical reports  
57  
58  
59  
60

1  
2  
3 and tables), and can take responsibility for the integrity of the data and the accuracy of the  
4  
5 analysis. DW is guarantor.  
6  
7

8 **Funding:** The study was undertaken as part of the research programme of the NIHR Horizon  
9  
10 Scanning Centre (NIHR HSC). The NIHR HSC is funded by the National Institute for Health  
11  
12 Research (NIHR). The NIHR had no role in the study design; in the collection, analysis, and  
13  
14 interpretation of the data; in the preparation of the manuscript; or in the decision to submit the  
15  
16 article for publication.  
17  
18

19  
20 **Competing interests:** All authors have completed the Unified Competing Interest form at  
21  
22 [www.icmje.org/coi\\_disclosure.pdf](http://www.icmje.org/coi_disclosure.pdf) (available on request from the corresponding author) and  
23  
24 declare that (1) DW, OM, SS and AS have support from the National Institute for Health  
25  
26 Research for the submitted work; (2) DW, OM, SS and AS have no relationships that might  
27  
28 have an interest in the submitted work in the previous 3 years; (3) their spouses, partners, or  
29  
30 children have no financial relationships that may be relevant to the submitted work; and (4)  
31  
32 DW, OM, SS and AS have no non-financial interests that may be relevant to the submitted  
33  
34 work.  
35  
36  
37

38 **Ethical approval:** Not required.  
39  
40

41  
42 **Data sharing:** Please contact the corresponding author: [o.i.martino@bham.ac.uk](mailto:o.i.martino@bham.ac.uk)  
43  
44

45 **Copyright/licence for publication:** The Corresponding Author has the right to grant on  
46  
47 behalf of all authors and does grant on behalf of all authors, a worldwide licence to the  
48  
49 Publishers and its licensees in perpetuity, in all forms, formats and media (whether known  
50  
51 now or created in the future), to i) publish, reproduce, distribute, display and store the  
52  
53 Contribution, ii) translate the Contribution into other languages, create adaptations, reprints,  
54  
55 include within collections and create summaries, extracts and/or, abstracts of the  
56  
57  
58  
59  
60

1  
2  
3 Contribution, iii) create any other derivative work(s) based on the Contribution, iv) to exploit  
4 all subsidiary rights in the Contribution, v) the inclusion of electronic links from the  
5 Contribution to third party material where-ever it may be located; and, vi) licence any third  
6 party to do any or all of the above.  
7  
8  
9  
10

## 11 12 13 14 15 REFERENCES

- 16  
17 1. Miller HI. Pharma innovation in critical condition. *Genetic Engineering & Biotechnology*  
18 *News*. 2009;29(21). Available from: [http://www.genengnews.com/gen-articles/pharma-](http://www.genengnews.com/gen-articles/pharma-innovation-in-critical-condition/3115/)  
19 [innovation-in-critical-condition/3115/](http://www.genengnews.com/gen-articles/pharma-innovation-in-critical-condition/3115/)  
20  
21  
22  
23  
24  
25  
26 2. Lis Y, Walker SR. Novel medicines marketed in the UK 1960-1987. *Br J Clin Pharmacol*  
27 1989;28:333-343.  
28  
29  
30  
31  
32  
33 3. DiMasi JA. The value of improving the productivity of the drug development process:  
34 Faster times and better decisions. *Pharmacoeconomics* 2002;20(Suppl.):1-10.  
35  
36  
37  
38  
39 4. DiMasi JA, Hansen RW, Grabowski HG. The price of innovation: New estimates of drug  
40 development costs. *J Health Econ* 2003;22:151-85.  
41  
42  
43  
44  
45  
46 5. Munos B. Lessons from 60 years of pharmaceutical innovation. *Nat Rev Drug Discov*  
47 2009;8: 959-68.  
48  
49  
50  
51  
52 6. Wurtman RJ, Bettiker RL. The slowing of treatment discovery, 1965-1995. *Nat Med*  
53 1995;1: 1122-25.  
54  
55  
56  
57  
58  
59  
60

1  
2  
3 7. US Food and Drug Administration (FDA). Innovation or stagnation: Challenge and  
4 opportunity on the critical path to new medicinal products. 2004 [cited 2 Feb 2012].

5  
6  
7 Available from:

8  
9  
10 <http://www.fda.gov/ScienceResearch/SpecialTopics/CriticalPathInitiative/CriticalPathOpportunitiesReports/ucm077262.htm>

11  
12  
13  
14  
15  
16 8. Charlton BG. Why medical research needs a new specialty of 'pure medical science'. *Clin Med* 2006;6:163-65.

17  
18  
19  
20  
21  
22  
23 9. Lancet editorial. Where will new drugs come from? *Lancet* 2011;377:97  
24  
25 doi:10.1016/S0140-6736(11)60001-9.

26  
27  
28  
29  
30 10. Scannell JW, Blanckley A, Boldon H, Warrington B. Diagnosing the decline in  
31 pharmaceutical R&D efficiency. *Nat Rev Drug Discov* 2012;11:191-200.

32  
33  
34  
35  
36 11. House of Commons. Health - Fourth Report.

37  
38 <http://www.publications.parliament.uk/pa/cm200405/cmselect/cmhealth/42/4202.htm> 22

39  
40  
41 March 2005.

42  
43  
44 12. US Food and Drug Administration (FDA). Drugs@FDA glossary of terms.

45  
46 <http://www.fda.gov/Drugs/InformationOnDrugs/ucm079436.htm> (date accessed 15 Aug  
47  
48 2012).

49  
50  
51  
52 13. Cohen FJ. Macro trends in pharmaceutical innovation. *Nat Rev Drug Discov* 2005;4:78-  
53  
54  
55 84.

1  
2  
3 14. Debnath B, Al-Mawsawi LQ, Neamati N. Are we living in the end of the blockbuster era?  
4  
5 *Drug News Perspect* 2010;23(10):670-84.  
6  
7

8  
9  
10 15. Canadian Agency for Drugs and Technologies in Health (CADTH). The economic value  
11  
12 of innovative health technologies. CADTH, Feb 2011.  
13

14  
15  
16 16. Grabowski HG, Wang YR. The quantity and quality of worldwide new drug  
17  
18 introductions, 1982-2003. *Health Aff* 2006;25:452-60.  
19  
20

21  
22  
23 17. Lichtenberg FR. Pharmaceutical innovation and the burden of disease in developing and  
24  
25 developed countries. 2005: Columbia University and the National Bureau of Economic  
26  
27 Research.  
28

29  
30  
31  
32 18. Schmid EF & Smith AF. Keynote review: Is declining innovation in the pharmaceutical  
33  
34 industry a myth? *Drug Discov Today* 2005;10:1031-39.  
35  
36

37  
38  
39 19. Light D, Lexchin J. Pharmaceutical R&D: What do we get for all that money? *BMJ*  
40  
41 2012;345:22-25.  
42  
43

44  
45 20. Kaitin KI, DiMasi JA. Pharmaceutical innovation in the 21<sup>st</sup> century: New drug approvals  
46  
47 in the first decade, 2000-2009. *Clin Pharmacol Ther* 2011;89:183-88.  
48  
49

50  
51  
52 21. Centre for Medicines Research. Twenty five new chemical entities launched in the UK in  
53  
54 1990. *CMR News* 1991;9:4-8.  
55  
56

1  
2  
3 22. Tansey IP, Armstrong NA, Walker SR. Trends in pharmaceutical innovation: The  
4 introduction of products on to the UK market, 1960-1989. *J Pharm Med* 1994;4:85-100.  
5  
6  
7

8  
9 23. Jefferys DB, Leakey D, Lewis JA, Payne S, Rawlins MD. New active substances  
10 authorized in the United Kingdom between 1972 and 1994. *Br J Clin Pharmacol*  
11 1998;45:151-56.  
12  
13  
14

15  
16  
17  
18 24. Keyhani S, Wang S, Hebert P, Carpenter D, Anderson G. US pharmaceutical innovation  
19 in an international context. *Am J Public Health* 2010;100:1075-80.  
20  
21  
22

23  
24 25. US Food and Drug Administration (FDA). Drugs@FDA Glossary of terms.  
25  
26 <http://www.fda.gov/Drugs/InformationOnDrugs/ucm079436.htm#B> (date accessed 15 Aug  
27 2012).  
28  
29  
30  
31

32  
33  
34 26. Abraham J, Davis C. Testing times: The emergence of the practolol disaster and its  
35 challenges to British drug regulation in the modern period. *Soc Hist Med* 2006;19:127-47.  
36  
37  
38

39  
40 27. Carpenter D. Reputation and Power: Organizational Image and Pharmaceutical  
41 Regulation at the FDA. 2010; Princeton: Princeton University Press.  
42  
43  
44

45  
46  
47 28. Griffin JP, Weber JCP. Product licence delays. *Int Pharm J* 1987;1:232-33.  
48  
49  
50

51  
52 29. US Food and Drug Administration (FDA). HIV specific resources.  
53 [http://www.fda.gov/ForConsumers/ByAudience/ForPatientAdvocates/SpeedingAccessToImp  
54 ortantNewTherapies/ucm181838.htm](http://www.fda.gov/ForConsumers/ByAudience/ForPatientAdvocates/SpeedingAccessToImportantNewTherapies/ucm181838.htm) (date accessed 19 Oct 2012).  
55  
56  
57  
58  
59  
60



1  
2  
3  
4  
5 30. Berndt ER, Gottschalk AHB, Philipson TJ, Strobeck M. Industry funding of the FDA:

6  
7 Effects of PDUFA on approval times and withdrawal rates. *Nat Rev Drug Discov*

8  
9 2005;4:545-54.

10  
11  
12  
13  
14 31. Sahoo A. Drug approval trends at the FDA and EMEA: Process improvements,

15  
16 heightened security and industry response. 2008; Business Insights Ltd.

17  
18  
19  
20  
21 32. European Commission. Orphan medicinal products. <http://ec.europa.eu/health/human->

22  
23 [use/orphan-medicines/index\\_en.htm](http://ec.europa.eu/health/human-use/orphan-medicines/index_en.htm) (date accessed 19 Oct 2012).

24  
25  
26  
27 33. Aronson JK. Drug development: more science, more education. *Br J Clin Pharmacol*

28  
29 2005;59:377-8.

30  
31  
32  
33  
34 34. Berndt ER, Cockburn IM, Grépin KA. The impact of incremental innovation in

35  
36 biopharmaceuticals: Drug utilisation in original and supplemental indications.

37  
38 *Pharmacoeconomics* 2006;24 Suppl. 2:69-86.

39  
40  
41  
42  
43 35. Berggren R, Møller M, Moss R, Poda P, Smietana K. Outlook for the next 5 years in drug

44  
45 innovation. *Nat Rev Drug Discov* 2012;11:435-36.

46  
47  
48  
49 36. Sams-Dodd F. Target-based drug discovery: Is something wrong? *Drug Discov Today*

50  
51 2005;10:139-47.

1  
2  
3  
4  
5  
6  
7  
8  
9  
10  
11  
12  
13  
14  
15  
16  
17  
18  
19  
20  
21  
22  
23  
24  
25  
26  
27  
28  
29  
30  
31  
32  
33  
34  
35  
36  
37  
38  
39  
40  
41  
42  
43  
44  
45  
46  
47  
48  
49  
50  
51  
52  
53  
54  
55  
56  
57  
58  
59  
60

37. Huebner J. A possible declining trend for worldwide innovation. *Technol Forecast Soc Change* 2005;72:980-86.

For peer review only

1  
2  
3 **Declines in new drug launches: myth or reality? Retrospective**  
4  
5 **observational study using 30 years of data from the United Kingdom.**  
6  
7

8  
9 Derek J Ward, clinical senior lecturer,<sup>1</sup> Orsolina I Martino, research fellow,<sup>1</sup> Sue Simpson,  
10  
11 research fellow,<sup>1</sup> Andrew Stevens, professor of public health<sup>2</sup>  
12

13  
14 <sup>1</sup> NIHR Horizon Scanning Centre, University of Birmingham, B15 2SQ.  
15

16 <sup>2</sup> Public Health, Epidemiology & Biostatistics, University of Birmingham, B15 2TT.  
17  
18

19  
20  
21 Correspondence to: OI Martino [o.i.martino@bham.ac.uk](mailto:o.i.martino@bham.ac.uk)  
22  
23

24  
25 **Keywords:** Innovation; pharmaceutical; new drugs; drug launches; United Kingdom.  
26  
27  
28  
29  
30  
31  
32  
33  
34  
35  
36  
37  
38  
39  
40  
41  
42  
43  
44  
45  
46  
47  
48  
49  
50  
51  
52  
53  
54  
55  
56  
57  
58  
59  
60

## ABSTRACT

**Background:** There is wide concern that pharmaceutical innovation is declining. Reported trends suggest that fewer new drugs have been launched over recent decades, despite increasing investment into research and development.

**Objective:** To describe trends in new drugs launched in the UK from 1982 to 2011 and test the hypothesis that the rate of new drug introductions has declined over the study period.

**Design:** Retrospective observational study.

**Setting and data source:** Database of new preparations added annually to the British National Formulary (BNF).

**Main outcome measures:** The number of new drugs entered each year, including new chemical entities (NCEs) and new biologic drugs, based on first appearance in the BNF.

**Results:** There was no significant linear trend in the number of new drugs introduced into the UK from 1982 to 2011. Following a dip in the mid-1980s (11-12 NCEs/new biologics introduced annually from 1985 to 1987), there was a variable increase in numbers of new drugs introduced annually to a peak of 34 in 1997. This peak was followed by a decline to approximately 20 new drugs per year between 2003 and 2006, and another peak in 2010. Extending the timeline further back with existing published data shows an overall slight increase in new drug introductions of 0.16 per year over the entire 1971 to 2011 period.

**Conclusions:** The purported 'innovation dip' is an artefact of the time periods previously studied. Reports of declining innovation need to be considered in the context of their timescale and perspective.

## ARTICLE SUMMARY

**Article focus**

- There is wide concern that pharmaceutical innovation is declining. Reported trends suggest that fewer new drugs have been launched over recent decades, despite increasing investment in R&D.

**Key messages**

- Whilst there are dips and peaks during specific time periods, the longer-term trend contradicts the widely held view that pharmaceutical innovation is declining, suggesting that annual numbers of newly launched drugs may have increased since the early 1970s.
- It is important to take into account the start and end dates included in analyses when interpreting time trends.

**Strengths and limitations of this study**

- This is the most up-to-date study of trends in the launch of new drugs in the UK, using 30 years of complete data. The results are consistent with data on US and worldwide drug launches.
- Although numbers of NCEs and new biologic agents launched are a useful indicator of trends in pharmaceutical innovation, they are not the sole metric. Our data do not differentiate between varying degrees of novelty or clinical importance, which may represent different levels of innovation.

## INTRODUCTION

Despite increasing pharmaceutical research and development (R&D) times, costs and spending,<sup>1-5</sup> there are concerns that these increasing efforts are not being reflected in the numbers of new drugs being brought to market. Indeed, it is widely reported that there has been a decline or dip in the rate of development of new drugs over recent decades.<sup>1;6-10</sup>

Within the context of drug development, a new innovation is generally defined as the discovery, development and bringing to market of a new chemical entity (NCE);<sup>11</sup> 'an active ingredient that has never been marketed... in any form'.<sup>12</sup> These new entities may be relatively minor modifications of existing drugs or represent radical new breakthroughs.

Much of the evidence for an 'innovation dip' comes from North America. Data from the United States (US) Food & Drug Administration (FDA) show a downward trend in the number of NCEs introduced throughout the 1990s and at the start of the new millennium,<sup>13,14</sup> with the 18 new medicines approved in 2007 'the lowest figure in a quarter of a century'.<sup>1</sup> A decrease has also been noted in patented medicines granted market access in Canada between 1997 and 2008.<sup>15</sup> Worldwide data also indicate a decline in NCE introductions between 1982 and 2002/03,<sup>16,17</sup> however studies that include earlier decades suggest that this may be an artefact of a peak in 1996, with a return to historic levels thereafter.<sup>5;18-20</sup> More recent trends also show an increase in new biologic agents<sup>5;13;16;18</sup> and orphan products,<sup>16</sup> which suggests a shift in the focus of innovation. Papers focussing specifically on the United Kingdom (UK) report a decline in NCEs launched from 1960 to the late 1980s,<sup>2;21,22</sup> although the downward trend is considerably weakened by omitting the years 1960-63.<sup>22</sup> Numbers of NCEs authorised in the UK between 1972 and 1994 also show no consistent annual trend, although there was an increase in authorisations of new biological entities and products of biotechnology.<sup>23</sup> By contrast, numbers of all newly launched medicines, including new

1  
2  
3 formulations of existing drugs and generic drugs, show no decline in new product  
4  
5 introductions in the UK subsequent to the implementation of the Medicines Act 1968 in  
6  
7 1971, though there had been a fall in new drugs launched in the early 1960s following the  
8  
9 thalidomide tragedy.<sup>22</sup> However, even though there is disagreement on the crude rate of drug  
10  
11 launch, it does at least seem certain that the rate per R&D spend has declined. Scannell and  
12  
13 colleagues calculated that the rate of new drugs per billion dollars spent on R&D (adjusted  
14  
15 for inflation) has halved approximately every 9 years since the 1950s.<sup>10</sup>  
16  
17

18  
19 We aimed to test the widely held belief that annual numbers of new drugs launched in the UK  
20  
21 have declined or are declining. After the US, the UK is the next largest source of NCE  
22  
23 development, accounting for 10.4% of pharmaceutical innovation worldwide.<sup>24</sup> It is  
24  
25 recognised that prior to the implementation of the Medicines Act 1968 there was no formal  
26  
27 licensing of medicines in the UK, other than those covered by the Therapeutic Substances  
28  
29 Act 1956;<sup>2</sup> earlier evidence suggests that the Medicines Act 1968 would have slowed or even  
30  
31 prevented some product introductions from the early 1970s onwards.<sup>22</sup> New drugs include  
32  
33 both NCEs and new biologic agents, which are medicinal products created by biological  
34  
35 processes rather than chemical synthesis. New biologics include vaccines, blood products,  
36  
37 allergenic extracts, somatic cells, gene therapies, tissues, recombinant therapeutic proteins, or  
38  
39 living cells used therapeutically.<sup>25</sup> We primarily considered the period from 1982 to 2011, but  
40  
41 also incorporated existing published UK data<sup>2,21,22</sup> in order to consider the entire period from  
42  
43 the implementation of the Medicines Act 1968 in 1971.  
44  
45  
46  
47  
48  
49  
50  
51  
52  
53  
54  
55  
56  
57  
58  
59  
60

## METHODS

### Data collection and classification of entries

We obtained data on the numbers of new drugs (NCEs and new biologic agents) launched in the UK each year from relevant editions of the British National Formulary (BNF). The BNF lists all preparations available for prescribing and/or dispensing in the UK, including prescription-only and over the counter medicines, not all of which are available on the National Health Service (NHS). Information on the active ingredient for every item in the 'new preparations' section of each edition of the BNF from edition 3 in 1982 to edition 62 in 2011 was obtained and entered onto a database. As the BNF also includes non-drug products, these were excluded (nutraceutical and medical foods, natural products, devices and diagnostic products – definitions are given in appendix 1) leaving only drugs (NCEs, existing chemical compounds, new salts or esters of existing chemical compounds, new biologic agents and existing biologic agents). Different dosages of the same product (e.g. 5mg and 10mg tablets) were counted once; different formulations of the same product, e.g. tablet and intramuscular injection, were counted once if they contained the same active ingredients, and multiple times if they contained different active ingredients. Different indications for the same product were counted once.

### Definition of new drugs

Entries were classified as new (NCE or new biologic agent) by checking whether the drug substance appeared in previous editions of the BNF. New formulations, generic versions and new salts or esters of existing drugs were therefore not classified as new. Commercial pharmaceutical databases (PharmaProjects V5.2, Informa Healthcare. and Adis R&D Insight, Wolters Kluwer Pharma Solutions) were also used to determine whether a substance was a new drug at the date of UK launch. Where preparations could not be found in commercial



1  
2  
3 pharmaceutical databases, we undertook internet searches for scientific articles or patents  
4  
5 relating to the substances.  
6  
7

## 8 **Analysis**

9  
10  
11 Time trends in the numbers of new drugs introduced in the UK were analysed using linear  
12 regression (SPSS v17.0, IBM). Year (1971 to 2011) was treated as a continuous variable. The  
13  
14 primary analysis included all new drugs (NCEs and new biologics) added to the BNF from  
15  
16 1982 to 2011, with a sub-analysis of the 1997-2006 decade for comparison with the published  
17  
18 literature on worldwide NCE launches.<sup>16</sup> Analysis of covariance (ANCOVA) was used to test  
19  
20 for homogeneity of regression before and after the 1997 peak, with number of new drugs as  
21  
22 the dependent variable and year as the covariate, grouped by the periods either side of the  
23  
24 peak (1982-1997 and 1998-2011). The secondary analysis incorporated existing published  
25  
26 UK data to include all new drug introductions from 1971 to 2011. Data on NCE launches  
27  
28 were originally reported by Lis & Walker<sup>2</sup> using published sources including the BNF, the  
29  
30 Monthly Index of Medical Specialties (MIMS; Haymarket Group) and Scrip (Informa), up to  
31  
32 1987; this was extended up to 1990 by the Centre for Medicines Research (CMR; now Centre  
33  
34 for Medicines Research International, The Thomson Corporation, London).<sup>21</sup> Where there  
35  
36 was overlap (1982 to 1990), we took the average of the two values.  
37  
38  
39  
40  
41  
42  
43  
44  
45

## 46 **RESULTS**

### 47 48 **Analysis 1: New drugs launched from 1982 to 2011**

49  
50  
51 Figure 1 shows the number of new drugs launched annually in the UK from 1982 to 2011.  
52  
53  
54 The mean number of new drugs introduced each year was 23.9 (SE 1.16). The lowest was 11  
55  
56 in 1985, and the highest was 34 in 1997 and again in 2010. These data suggest only a minor  
57  
58  
59  
60

1  
2  
3 upward linear trend in the annual numbers of new drugs launched, a result that was not  
4  
5 statistically significant (new drugs launched:  $y = -291 + 0.16 \times \text{year}$ ,  $r = 0.22$ ,  $p = 0.25$ ).  
6  
7

8 [Insert Figure 1 here]  
9

10  
11 **Figure 1: New drugs launched in the UK from 1982 to 2011.**  
12

13  
14 A sub-analysis for the 1997-2006 decade (Figure 2) revealed a statistically significant  
15  
16 downward trend (new drugs launched:  $y = 3047 - 1.51 \times \text{year}$ ,  $r = 0.89$ ,  $p = 0.001$ ). ANCOVA  
17  
18 showed no significant interaction between year and period ( $F_{1,26} = 2.68$ ,  $p = 0.11$ ), indicating  
19  
20 equality of regression slopes pre- and post-1997. There was significant positive first-order  
21  
22 autocorrelation in the residuals (Durbin-Watson statistic = 1.09,  $p < 0.01$ ).  
23  
24

25  
26 [Insert Figure 2 here]  
27  
28

29 **Figure 2: New drugs launched between 1997 and 2006.**  
30  
31

32  
33  
34  
35 **Analysis 2: New drugs launched from 1971 to 2011**  
36

37 This analysis used new drug data collected for this study from the BNF and NCE data from  
38  
39 the CMR to extend our timeline back to 1971 (Figure 3). The mean number of new drugs  
40  
41 introduced each year was 22.7 (SD 6.0). The lowest was 9 in 1985, and the highest was 34 in  
42  
43 1997 and 2010. These data showed a modest upward linear trend in the annual numbers of  
44  
45 new drugs launched between 1971 and 2011, a result that was statistically significant. In  
46  
47 addition, the rate of annual increase was very similar to that seen in our data for the period  
48  
49 1982-2011 (new drugs launched:  $y = -296 + 0.16 \times \text{year}$ ,  $r = 0.32$ ,  $p = 0.04$ ). Again,  
50  
51 ANCOVA revealed no interaction between year and period, indicating equality of regression  
52  
53 slopes pre- and post-1997 ( $F_{1,37} = 2.35$ ,  $p = 0.13$ ). There was significant positive first-order  
54  
55 autocorrelation in the residuals (Durbin-Watson statistic = 1.10,  $p < 0.01$ ).  
56  
57  
58  
59  
60

1  
2  
3 [Insert Figure 3 here]  
4  
5

6 **Figure 3: New drugs launched in the UK from 1971 to 2011.**  
7  
8  
9

## 10 11 **DISCUSSION**

12  
13  
14  
15 This is the most complete study of the number of new drug introductions in the UK, with 30  
16 years complete data on new products. The BNF includes all medicinal products available for  
17 dispensing in the UK and is updated every six months, providing an accurate and reliable  
18 account of new drugs launched in the UK each year. We found no statistically significant  
19 linear trend in new drug introductions between 1982 and 2011, however a statistically  
20 significant, though modest upward trend was observed after extending the data further to  
21 include the years 1971 to 1981,<sup>21,22</sup> contradicting the widely held view that the number of  
22 new medicines being launched is declining. Although there was indeed a dip in new drug  
23 introductions during the decade from 1997 to 2006, this was largely an artefact of a peak in  
24 1997, which was itself preceded by an unusually low number of launches in 1985-87.  
25  
26  
27  
28  
29  
30  
31  
32  
33  
34  
35  
36

37 Additionally, the peak number of new drugs added to the BNF in 1997 was matched in 2010.  
38  
39

40 The main limitation of the study is that it only describes trends in launch and cannot attribute  
41 causes to changes; nor do we here disaggregate the data to explore different trends for  
42 different treatments and different disease groups. There are nonetheless key events during the  
43 timeline that should be noted, as they may provide some insight into the observed trends.  
44  
45  
46  
47  
48

49 Despite the implementation of the Medicines Act 1968, it has been argued that the  
50 thalidomide crisis did not lead to more rigorous drug regulation; instead, there was a culture  
51 of 'reluctant regulation' which was linked to trust and optimism concerning the safety of new  
52 drugs, and avoiding potential conflicts with industry interest.<sup>26,27</sup> This arrangement was  
53  
54  
55  
56  
57  
58  
59  
60

1  
2  
3 disrupted by the practolol disaster of the early 1980s, which resulted in approximately 2,450  
4 reports of adverse reactions including 40 deaths,<sup>26</sup> and the withdrawal of four NCEs  
5 worldwide in 1983 due to safety concerns<sup>2,28</sup> and may partly explain the low number of new  
6 drugs launched during 1985-1987.<sup>27</sup> The European Agency for the Evaluation of Medicinal  
7 Products (European Medicines Agency [EMA] since 2004) was set up with funding from the  
8 European Union and the pharmaceutical industry to integrate the work of existing national  
9 medicine regulatory bodies, and may also have impacted upon new drug approvals and  
10 launches following its inception in 1995. Changes in drug review processes may partially  
11 account for the peak in new drugs launched in the mid-1990s, and the generally higher levels  
12 observed in the latter half of the timeline. For example, faster approval times by the FDA  
13 following the global AIDS epidemic<sup>29</sup> and the introduction of the Prescription Drug User Fee  
14 Acts from 1992<sup>30</sup> may have influenced worldwide marketing approaches, including decisions  
15 to seek new drug licenses; while in Europe, a new review system implemented by the EMA  
16 in 2006 attempted to reduce approval times for innovative drugs offering significant clinical  
17 benefit.<sup>31</sup> Increased innovation could also be driven by policy, such as the EU Regulation on  
18 orphan medicinal products, which exists to stimulate research and development into drugs for  
19 rare conditions.<sup>31,32</sup>

20  
21  
22  
23  
24  
25  
26  
27  
28  
29  
30  
31  
32  
33  
34  
35  
36  
37  
38  
39  
40  
41 We included all new drugs in the analysis, but did not separate these into 'first-in-class' and  
42 'me-too' drugs, which arguably represent different levels of innovation and significance. It  
43 has been asserted that the true 'innovation crisis' is due to the majority of new drugs being  
44 chemically similar to existing ones and offering few therapeutic gains.<sup>19</sup> Yet data from the  
45 FDA show that the percentage of priority products (i.e. those that appear to represent an  
46 advance over available therapies)<sup>12</sup> reached a 30-year high during 2005-09, at almost 50% of  
47 total new drug approvals.<sup>20</sup> We also excluded incremental innovation to existing drugs, such  
48 as new indications and formulations, which in some cases can be as important as new drug  
49  
50  
51  
52  
53  
54  
55  
56  
57  
58  
59  
60

1  
2  
3 launches in terms of clinical and economic benefits.<sup>33,34</sup> Berndt and colleagues demonstrated  
4  
5 an overall increase in the number of supplementary new drug approvals for new indications  
6  
7 for three major drug classes (ACE inhibitors, histamine H<sub>2</sub>-antagonists/proton-pump  
8  
9 inhibitors, and selective serotonin/norepinephrine reuptake inhibitors) since the early 1990s,  
10  
11 suggesting that the value of incremental innovation may be overlooked when assessing  
12  
13 productivity trends for pharmaceutical R&D.<sup>34</sup> It should nevertheless be noted that there is no  
14  
15 standard framework for assessing the therapeutic value of drugs developed over such a broad  
16  
17 time frame and variety of classes.<sup>24</sup>  
18  
19

20  
21 The findings are consistent with published reports of decreasing drug introductions, but only  
22  
23 during the mid-1990s to early 2000s.<sup>1;2;7;13;16;17;21</sup> In particular, there was consistency with the  
24  
25 CMR data for UK NCE launches up to 1990;<sup>21</sup> minor variations were likely to be due to  
26  
27 differences in the data sources used. However, the data do not show a longer term decline,  
28  
29 but instead support more recent analyses suggesting a return to historic levels following a  
30  
31 peak around 1997.<sup>5;18-20</sup> Clearly the start and end dates included in analyses can influence the  
32  
33 interpretation of time trends. Furthermore, the trend gradients for the present study data and  
34  
35 the longer time trend are very similar, only reaching statistical significance with sufficient  
36  
37 data points. Taken together they indicate a gradual increase in the annual number of new drug  
38  
39 introductions (approximately 0.16 new drugs per year). This is in line with a recent  
40  
41 forecasting analysis, which predicts an increase in new drug launches in the 2012-2016  
42  
43 period compared with the previous five years to 2011.<sup>35</sup>  
44  
45  
46  
47  
48

49 Whilst the data do not show a reduction in absolute numbers of new drugs, it has been argued  
50  
51 that the pharmaceutical industry has become less productive, as the number of new drugs  
52  
53 launched has not increased relative to R&D time and expenditure or the availability of more  
54  
55 advanced technology.<sup>5;7;10;21;36</sup> The cost per new drug produced is estimated to have grown at  
56  
57 an annual compound rate of 13.4% since the 1950s; adjusting for inflation (3.7% per year)  
58  
59  
60

1  
2  
3 and other cost increases such as regulation (8.3% per year) increases the estimated cost per  
4  
5 new drug considerably.<sup>5</sup> This may be a cause for concern, and certainly for disappointment in  
6  
7 the pharmaceutical industry. Advances at the drug discovery stage (e.g. the introduction of  
8  
9 high throughput screening in the late 1980s and early '90s) in theory means that more new  
10  
11 compounds can be investigated more quickly and the introduction of target-based drug  
12  
13 discovery in the mid-1990s was a further promising breakthrough. However, drug  
14  
15 development times have been increasing; the time taken to bring a new drug to market rose  
16  
17 from approximately 3 years in 1960<sup>2</sup> to 12 years at the start of the new millennium.<sup>3</sup>

20 Notwithstanding the EMA's (and FDA's) attempts to accelerate approvals these may reflect  
21  
22 more rigorous processes and requirements, and higher rejection rates in establishing the  
23  
24 safety and efficacy of new drugs.<sup>7</sup> It has also been suggested that we are approaching the  
25  
26 scientific and economic limits of innovation,<sup>37</sup> so there may be a ceiling limiting drug  
27  
28 discovery.  
29  
30

31  
32 The nature and context of pharmaceutical innovation have changed considerably over the last  
33  
34 half century. We now need a further exploration of the detail of the nature of the drugs  
35  
36 launched and of the events surrounding the innovation timeline to elucidate the factors  
37  
38 underpinning the apparent steady state.  
39  
40  
41  
42  
43  
44

45 **Acknowledgements:** We thank Mr Nuredin Mohammed for advising on the analysis for this  
46  
47 study.  
48

49  
50 **Contributors:** All authors were involved in the study conception and design, contributed  
51  
52 substantially to the interpretation of the data and to subsequent drafts of the paper, and  
53  
54 approved the final version. OM collected and analysed the data, and produced the initial draft  
55  
56 of the paper. All authors had full access to all of the study data (including statistical reports  
57  
58  
59  
60

1  
2  
3 and tables), and can take responsibility for the integrity of the data and the accuracy of the  
4  
5 analysis. DW is guarantor.  
6  
7

8 **Funding:** The study was undertaken as part of the research programme of the NIHR Horizon  
9  
10 Scanning Centre (NIHR HSC). The NIHR HSC is funded by the National Institute for Health  
11  
12 Research (NIHR). The NIHR had no role in the study design; in the collection, analysis, and  
13  
14 interpretation of the data; in the preparation of the manuscript; or in the decision to submit the  
15  
16 article for publication.  
17  
18

19  
20 **Competing interests:** All authors have completed the Unified Competing Interest form at  
21  
22 [www.icmje.org/coi\\_disclosure.pdf](http://www.icmje.org/coi_disclosure.pdf) (available on request from the corresponding author) and  
23  
24 declare that (1) DW, OM, SS and AS have support from the National Institute for Health  
25  
26 Research for the submitted work; (2) DW, OM, SS and AS have no relationships that might  
27  
28 have an interest in the submitted work in the previous 3 years; (3) their spouses, partners, or  
29  
30 children have no financial relationships that may be relevant to the submitted work; and (4)  
31  
32 DW, OM, SS and AS have no non-financial interests that may be relevant to the submitted  
33  
34 work.  
35  
36

37  
38 **Ethical approval:** Not required.  
39  
40

41  
42 **Data sharing:** Please contact the corresponding author: [o.i.martino@bham.ac.uk](mailto:o.i.martino@bham.ac.uk)  
43  
44

45 **Copyright/licence for publication:** The Corresponding Author has the right to grant on  
46  
47 behalf of all authors and does grant on behalf of all authors, a worldwide licence to the  
48  
49 Publishers and its licensees in perpetuity, in all forms, formats and media (whether known  
50  
51 now or created in the future), to i) publish, reproduce, distribute, display and store the  
52  
53 Contribution, ii) translate the Contribution into other languages, create adaptations, reprints,  
54  
55 include within collections and create summaries, extracts and/or, abstracts of the  
56  
57  
58  
59  
60

1  
2  
3 Contribution, iii) create any other derivative work(s) based on the Contribution, iv) to exploit  
4 all subsidiary rights in the Contribution, v) the inclusion of electronic links from the  
5 Contribution to third party material where-ever it may be located; and, vi) licence any third  
6 party to do any or all of the above.  
7  
8  
9  
10

## 11 12 13 14 15 REFERENCES

- 16  
17 1. Miller HI. Pharma innovation in critical condition. *Genetic Engineering & Biotechnology*  
18 *News*. 2009;29(21). Available from: [http://www.genengnews.com/gen-articles/pharma-](http://www.genengnews.com/gen-articles/pharma-innovation-in-critical-condition/3115/)  
19 [innovation-in-critical-condition/3115/](http://www.genengnews.com/gen-articles/pharma-innovation-in-critical-condition/3115/)  
20  
21  
22  
23  
24  
25  
26 2. Lis Y, Walker SR. Novel medicines marketed in the UK 1960-1987. *Br J Clin Pharmacol*  
27 1989;28:333-343.  
28  
29  
30  
31  
32  
33 3. DiMasi JA. The value of improving the productivity of the drug development process:  
34 Faster times and better decisions. *Pharmacoeconomics* 2002;20(Suppl.):1-10.  
35  
36  
37  
38  
39 4. DiMasi JA, Hansen RW, Grabowski HG. The price of innovation: New estimates of drug  
40 development costs. *J Health Econ* 2003;22:151-85.  
41  
42  
43  
44  
45  
46 5. Munos B. Lessons from 60 years of pharmaceutical innovation. *Nat Rev Drug Discov*  
47 2009;8: 959-68.  
48  
49  
50  
51  
52 6. Wurtman RJ, Bettiker RL. The slowing of treatment discovery, 1965-1995. *Nat Med*  
53 1995;1: 1122-25.  
54  
55  
56  
57  
58  
59  
60



1  
2  
3 7. US Food and Drug Administration (FDA). Innovation or stagnation: Challenge and  
4 opportunity on the critical path to new medicinal products. 2004 [cited 2 Feb 2012].

5  
6  
7 Available from:

8  
9 <http://www.fda.gov/ScienceResearch/SpecialTopics/CriticalPathInitiative/CriticalPathOpportunitiesReports/ucm077262.htm>

10  
11  
12  
13  
14  
15  
16 8. Charlton BG. Why medical research needs a new specialty of 'pure medical science'. *Clin*  
17 *Med* 2006;6:163-65.

18  
19  
20  
21  
22  
23 9. Lancet editorial. Where will new drugs come from? *Lancet* 2011;377:97  
24  
25 doi:10.1016/S0140-6736(11)60001-9.

26  
27  
28  
29  
30 10. Scannell JW, Blanckley A, Boldon H, Warrington B. Diagnosing the decline in  
31 pharmaceutical R&D efficiency. *Nat Rev Drug Discov* 2012;11:191-200.

32  
33  
34  
35  
36 11. House of Commons. Health - Fourth Report.

37  
38 <http://www.publications.parliament.uk/pa/cm200405/cmselect/cmhealth/42/4202.htm> 22

39  
40  
41 March 2005.

42  
43  
44 12. US Food and Drug Administration (FDA). Drugs@FDA glossary of terms.

45  
46 <http://www.fda.gov/Drugs/InformationOnDrugs/ucm079436.htm> (date accessed 15 Aug  
47  
48 2012).

49  
50  
51  
52  
53 13. Cohen FJ. Macro trends in pharmaceutical innovation. *Nat Rev Drug Discov* 2005;4:78-  
54  
55 84.

1  
2  
3 14. Debnath B, Al-Mawsawi LQ, Neamati N. Are we living in the end of the blockbuster era?  
4  
5 *Drug News Perspect* 2010;23(10):670-84.  
6  
7

8  
9  
10 15. Canadian Agency for Drugs and Technologies in Health (CADTH). The economic value  
11  
12 of innovative health technologies. CADTH, Feb 2011.  
13

14  
15  
16 16. Grabowski HG, Wang YR. The quantity and quality of worldwide new drug  
17  
18 introductions, 1982-2003. *Health Aff* 2006;25:452-60.  
19  
20

21  
22  
23 17. Lichtenberg FR. Pharmaceutical innovation and the burden of disease in developing and  
24  
25 developed countries. 2005: Columbia University and the National Bureau of Economic  
26  
27 Research.  
28

29  
30  
31  
32 18. Schmid EF & Smith AF. Keynote review: Is declining innovation in the pharmaceutical  
33  
34 industry a myth? *Drug Discov Today* 2005;10:1031-39.  
35  
36

37  
38  
39 19. Light D, Lexchin J. Pharmaceutical R&D: What do we get for all that money? *BMJ*  
40  
41 2012;345:22-25.  
42  
43

44  
45 20. Kaitin KI, DiMasi JA. Pharmaceutical innovation in the 21<sup>st</sup> century: New drug approvals  
46  
47 in the first decade, 2000-2009. *Clin Pharmacol Ther* 2011;89:183-88.  
48  
49

50  
51  
52 21. Centre for Medicines Research. Twenty five new chemical entities launched in the UK in  
53  
54 1990. *CMR News* 1991;9:4-8.  
55  
56

1  
2  
3 22. Tansey IP, Armstrong NA, Walker SR. Trends in pharmaceutical innovation: The  
4 introduction of products on to the UK market, 1960-1989. *J Pharm Med* 1994;4:85-100.  
5  
6  
7

8  
9 23. Jefferys DB, Leakey D, Lewis JA, Payne S, Rawlins MD. New active substances  
10 authorized in the United Kingdom between 1972 and 1994. *Br J Clin Pharmacol*  
11 1998;45:151-56.  
12  
13  
14  
15

16  
17  
18 24. Keyhani S, Wang S, Hebert P, Carpenter D, Anderson G. US pharmaceutical innovation  
19 in an international context. *Am J Public Health* 2010;100:1075-80.  
20  
21  
22

23  
24 25. US Food and Drug Administration (FDA). Drugs@FDA Glossary of terms.  
25  
26 <http://www.fda.gov/Drugs/InformationOnDrugs/ucm079436.htm#B> (date accessed 15 Aug  
27 2012).  
28  
29  
30  
31

32  
33  
34 26. Abraham J, Davis C. Testing times: The emergence of the practolol disaster and its  
35 challenges to British drug regulation in the modern period. *Soc Hist Med* 2006;19:127-47.  
36  
37  
38

39  
40 27. Carpenter D. Reputation and Power: Organizational Image and Pharmaceutical  
41 Regulation at the FDA. 2010; Princeton: Princeton University Press.  
42  
43  
44

45  
46  
47 28. Griffin JP, Weber JCP. Product licence delays. *Int Pharm J* 1987;1:232-33.  
48  
49  
50

51  
52 29. US Food and Drug Administration (FDA). HIV specific resources.  
53 [http://www.fda.gov/ForConsumers/ByAudience/ForPatientAdvocates/SpeedingAccessstoImp  
54 ortantNewTherapies/ucm181838.htm](http://www.fda.gov/ForConsumers/ByAudience/ForPatientAdvocates/SpeedingAccessstoImportantNewTherapies/ucm181838.htm) (date accessed 19 Oct 2012).  
55  
56  
57  
58  
59  
60

1  
2  
3  
4  
5 30. Berndt ER, Gottschalk AHB, Philipson TJ, Strobeck M. Industry funding of the FDA:

6  
7 Effects of PDUFA on approval times and withdrawal rates. *Nat Rev Drug Discov*

8  
9 2005;4:545-54.

10  
11  
12  
13  
14 31. Sahoo A. Drug approval trends at the FDA and EMEA: Process improvements,

15  
16 heightened security and industry response. 2008; Business Insights Ltd.

17  
18  
19  
20  
21 32. European Commission. Orphan medicinal products. <http://ec.europa.eu/health/human->

22  
23 [use/orphan-medicines/index\\_en.htm](http://ec.europa.eu/health/human-use/orphan-medicines/index_en.htm) (date accessed 19 Oct 2012).

24  
25  
26  
27 33. Aronson JK. Drug development: more science, more education. *Br J Clin Pharmacol*

28  
29 2005;59:377-8.

30  
31  
32  
33  
34 34. Berndt ER, Cockburn IM, Grépin KA. The impact of incremental innovation in

35  
36 biopharmaceuticals: Drug utilisation in original and supplemental indications.

37  
38 *Pharmacoeconomics* 2006;24 Suppl. 2:69-86.

39  
40  
41  
42  
43 35. Berggren R, Møller M, Moss R, Poda P, Smietana K. Outlook for the next 5 years in drug

44  
45 innovation. *Nat Rev Drug Discov* 2012;11:435-36.

46  
47  
48  
49 36. Sams-Dodd F. Target-based drug discovery: Is something wrong? *Drug Discov Today*

50  
51 2005;10:139-47.

1  
2  
3 37. Huebner J. A possible declining trend for worldwide innovation. *Technol Forecast Soc*  
4  
5 *Change* 2005;72:980-86.  
6  
7  
8  
9  
10  
11  
12  
13  
14  
15  
16  
17  
18  
19  
20  
21  
22  
23  
24  
25  
26  
27  
28  
29  
30  
31  
32  
33  
34  
35  
36  
37  
38  
39  
40  
41  
42  
43  
44  
45  
46  
47  
48  
49  
50  
51  
52  
53  
54  
55  
56  
57  
58  
59  
60

For peer review only

1  
2  
3  
4  
5  
6  
7  
8  
9  
10  
11  
12  
13  
14  
15  
16  
17  
18  
19  
20  
21  
22  
23  
24  
25  
26  
27  
28  
29  
30  
31  
32  
33  
34  
35  
36  
37  
38  
39  
40  
41  
42  
43  
44  
45  
46  
47  
48  
49  
50  
51  
52  
53  
54  
55  
56  
57  
58  
59  
60

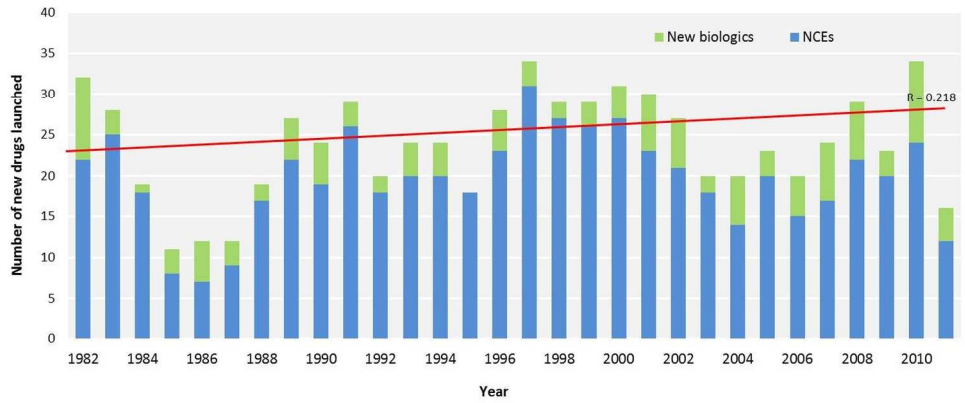

Figure 1: New drugs launched in the UK from 1982 to 2011.  
211x90mm (300 x 300 DPI)

Peer review only

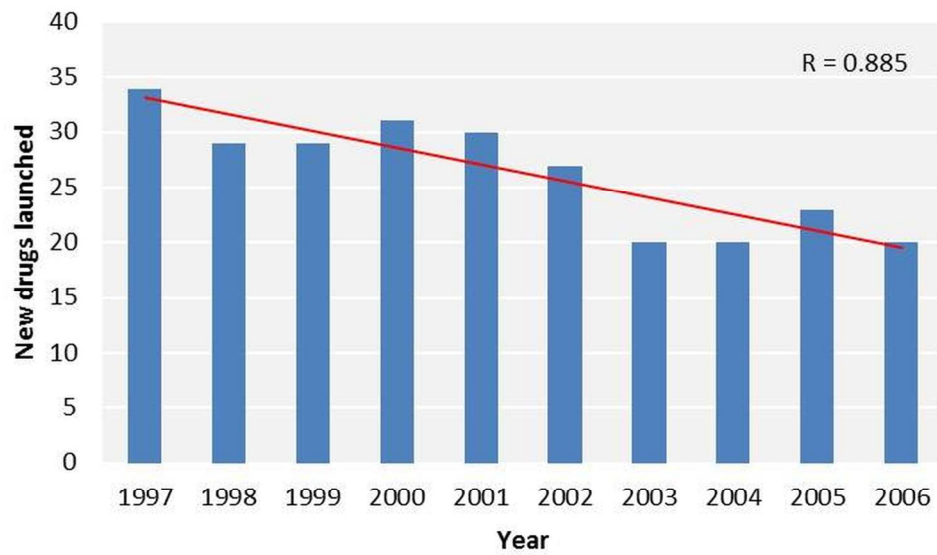

Figure 2: New drugs launched between 1997 and 2006.  
150x90mm (300 x 300 DPI)

1  
2  
3  
4  
5  
6  
7  
8  
9  
10  
11  
12  
13  
14  
15  
16  
17  
18  
19  
20  
21  
22  
23  
24  
25  
26  
27  
28  
29  
30  
31  
32  
33  
34  
35  
36  
37  
38  
39  
40  
41  
42  
43  
44  
45  
46  
47  
48  
49  
50  
51  
52  
53  
54  
55  
56  
57  
58  
59  
60

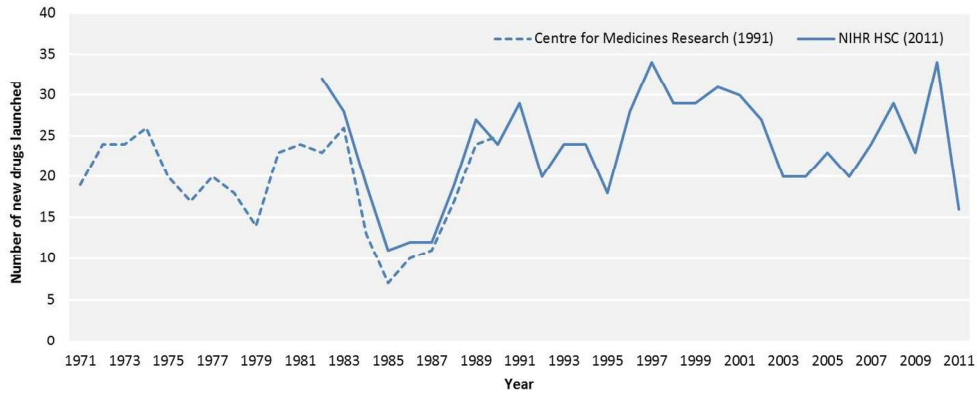

Figure 3: New drugs launched in the UK from 1971 to 2011.  
209x90mm (300 x 300 DPI)

Peer review only



## Appendix 1: Definitions and frequencies of new products by category, 1982 to 2011.

| Category                   |                                | No. (%)         | Definition                                                                                                                                                                                                                                                                                                                                                        |
|----------------------------|--------------------------------|-----------------|-------------------------------------------------------------------------------------------------------------------------------------------------------------------------------------------------------------------------------------------------------------------------------------------------------------------------------------------------------------------|
| New drugs & biologics      | NCEs                           | 589<br>(21.1)   | a) Appears in BNF for the first time <u>and</u><br>b) confirmed as being launched in the UK for the first time that year, or defined as NCE on commercial pharmaceutical databases. Includes new drug substances intended for therapeutic use; diagnostic agents are excluded (see 'Diagnostic products' below. <b>May include new isomers of existing drugs.</b> |
|                            | New biologics                  | 127<br>(4.6)    | Appears in BNF for the first time. Includes biologic drugs; blood products; vaccines e.g. first appearance for a particular disease; different strain of existing vaccine; new preparation technique for existing vaccine; and insulins e.g. new source of insulin; new type; new preparation technique.                                                          |
| Existing drugs & biologics | New salts/esters               | 31<br>(1.1)     | Appears in BNF for the first time in that form, where previous forms of the compound have already been entered.                                                                                                                                                                                                                                                   |
|                            | Existing compounds             | 1,622<br>(58.2) | A drug substance that a) already appears in an earlier edition of the BNF, <u>or</u> b) is defined as <i>not</i> being a new chemical entity on commercial pharmaceutical databases at date of first launch.                                                                                                                                                      |
|                            | Existing biologics             | 217<br>(7.8)    | Appears in earlier edition of BNF. Includes combinations of existing vaccines; and combinations of existing types of insulin.                                                                                                                                                                                                                                     |
| Other substances           | Nutraceuticals & medical foods | 135<br>(4.8)    | Includes vitamins, dietary supplements, foods for special diets, nutritionally complete or incomplete formulas for intravenous nutrition, and oral rehydration products.                                                                                                                                                                                          |
|                            | Natural products               | 22<br>(0.8)     | A substance that occurs naturally and has not been chemically manipulated – although mechanical manipulation may have taken place.                                                                                                                                                                                                                                |
|                            | Devices                        | 34<br>(1.2)     | E.g. spacer devices, bandages. These have not been separated into new and existing technologies, as genuine innovation is more difficult to define with devices.                                                                                                                                                                                                  |
|                            | Diagnostic products            | 4<br>(0.1)      | E.g. tests for helicobacter pylori. These are products used for the detection and/or diagnosis of diseases rather than therapeutically. <b>Does not include imaging agents as they do not appear in the BNF.</b>                                                                                                                                                  |
|                            | Uncoded                        | 7<br>(0.3)      | An entry where no specific substances (active or otherwise) have been named, e.g. 'cleansing solution'.                                                                                                                                                                                                                                                           |

## STROBE Statement—checklist of items that should be included in reports of observational studies

|                                   | Item No | Recommendation                                                                                                                                                                                                                                                                                                                                                                                                                                                                                                                                                                                                                                                                                   |
|-----------------------------------|---------|--------------------------------------------------------------------------------------------------------------------------------------------------------------------------------------------------------------------------------------------------------------------------------------------------------------------------------------------------------------------------------------------------------------------------------------------------------------------------------------------------------------------------------------------------------------------------------------------------------------------------------------------------------------------------------------------------|
| <b>Title and abstract</b>         | 1       | (a) Indicate the study's design with a commonly used term in the title or the abstract <b>PP.1-2</b><br>(b) Provide in the abstract an informative and balanced summary of what was done and what was found <b>P.2</b>                                                                                                                                                                                                                                                                                                                                                                                                                                                                           |
| <b>Introduction</b>               |         |                                                                                                                                                                                                                                                                                                                                                                                                                                                                                                                                                                                                                                                                                                  |
| Background/rationale              | 2       | Explain the scientific background and rationale for the investigation being reported <b>PP.4-5</b>                                                                                                                                                                                                                                                                                                                                                                                                                                                                                                                                                                                               |
| Objectives                        | 3       | State specific objectives, including any prespecified hypotheses <b>P.5</b>                                                                                                                                                                                                                                                                                                                                                                                                                                                                                                                                                                                                                      |
| <b>Methods</b>                    |         |                                                                                                                                                                                                                                                                                                                                                                                                                                                                                                                                                                                                                                                                                                  |
| Study design                      | 4       | Present key elements of study design early in the paper <b>P.5</b>                                                                                                                                                                                                                                                                                                                                                                                                                                                                                                                                                                                                                               |
| Setting                           | 5       | Describe the setting, locations, and relevant dates, including periods of recruitment, exposure, follow-up, and data collection                                                                                                                                                                                                                                                                                                                                                                                                                                                                                                                                                                  |
| Participants<br>N/A               | 6       | (a) <i>Cohort study</i> —Give the eligibility criteria, and the sources and methods of selection of participants. Describe methods of follow-up<br><i>Case-control study</i> —Give the eligibility criteria, and the sources and methods of case ascertainment and control selection. Give the rationale for the choice of cases and controls<br><i>Cross-sectional study</i> —Give the eligibility criteria, and the sources and methods of selection of participants<br>(b) <i>Cohort study</i> —For matched studies, give matching criteria and number of exposed and unexposed<br><i>Case-control study</i> —For matched studies, give matching criteria and the number of controls per case |
| Variables                         | 7       | Clearly define all outcomes, exposures, predictors, potential confounders, and effect modifiers. Give diagnostic criteria, if applicable <b>PP.6-7</b>                                                                                                                                                                                                                                                                                                                                                                                                                                                                                                                                           |
| Data sources/<br>measurement      | 8*      | For each variable of interest, give sources of data and details of methods of assessment (measurement). Describe comparability of assessment methods if there is more than one group <b>PP.6-7</b>                                                                                                                                                                                                                                                                                                                                                                                                                                                                                               |
| Bias                              | 9       | Describe any efforts to address potential sources of bias <b>N/A</b>                                                                                                                                                                                                                                                                                                                                                                                                                                                                                                                                                                                                                             |
| Study size                        | 10      | Explain how the study size was arrived at <b>PP.6-7</b>                                                                                                                                                                                                                                                                                                                                                                                                                                                                                                                                                                                                                                          |
| Quantitative variables            | 11      | Explain how quantitative variables were handled in the analyses. If applicable, describe which groupings were chosen and why <b>P.7</b>                                                                                                                                                                                                                                                                                                                                                                                                                                                                                                                                                          |
| Statistical methods<br><b>P.7</b> | 12      | (a) Describe all statistical methods, including those used to control for confounding<br>(b) Describe any methods used to examine subgroups and interactions<br>(c) Explain how missing data were addressed<br>(d) <i>Cohort study</i> —If applicable, explain how loss to follow-up was addressed<br><i>Case-control study</i> —If applicable, explain how matching of cases and controls was addressed<br><i>Cross-sectional study</i> —If applicable, describe analytical methods taking account of sampling strategy<br>(e) Describe any sensitivity analyses                                                                                                                                |

Continued on next page

**Results**

|                            |     |                                                                                                                                                                                                                                                                                                                                                                                                               |
|----------------------------|-----|---------------------------------------------------------------------------------------------------------------------------------------------------------------------------------------------------------------------------------------------------------------------------------------------------------------------------------------------------------------------------------------------------------------|
| Participants<br>N/A        | 13* | (a) Report numbers of individuals at each stage of study—eg numbers potentially eligible, examined for eligibility, confirmed eligible, included in the study, completing follow-up, and analysed<br>(b) Give reasons for non-participation at each stage<br>(c) Consider use of a flow diagram                                                                                                               |
| Descriptive data<br>PP.7-8 | 14* | (a) Give characteristics of study participants (eg demographic, clinical, social) and information on exposures and potential confounders<br>(b) Indicate number of participants with missing data for each variable of interest<br>(c) <i>Cohort study</i> —Summarise follow-up time (eg, average and total amount)                                                                                           |
| Outcome data<br>PP.7-8     | 15* | <i>Cohort study</i> —Report numbers of outcome events or summary measures over time<br><i>Case-control study</i> —Report numbers in each exposure category, or summary measures of exposure<br><i>Cross-sectional study</i> —Report numbers of outcome events or summary measures                                                                                                                             |
| Main results<br>PP.7-8     | 16  | (a) Give unadjusted estimates and, if applicable, confounder-adjusted estimates and their precision (eg, 95% confidence interval). Make clear which confounders were adjusted for and why they were included<br>(b) Report category boundaries when continuous variables were categorized<br>(c) If relevant, consider translating estimates of relative risk into absolute risk for a meaningful time period |
| Other analyses<br>P.8      | 17  | Report other analyses done—eg analyses of subgroups and interactions, and sensitivity analyses                                                                                                                                                                                                                                                                                                                |

**Discussion**

|                  |    |                                                                                                                                                                                            |
|------------------|----|--------------------------------------------------------------------------------------------------------------------------------------------------------------------------------------------|
| Key results      | 18 | Summarise key results with reference to study objectives <b>P.9</b>                                                                                                                        |
| Limitations      | 19 | Discuss limitations of the study, taking into account sources of potential bias or imprecision. Discuss both direction and magnitude of any potential bias <b>PP.9-11</b>                  |
| Interpretation   | 20 | Give a cautious overall interpretation of results considering objectives, limitations, multiplicity of analyses, results from similar studies, and other relevant evidence <b>PP.11-12</b> |
| Generalisability | 21 | Discuss the generalisability (external validity) of the study results <b>P.11-12</b>                                                                                                       |

**Other information**

|         |    |                                                                                                                                                                           |
|---------|----|---------------------------------------------------------------------------------------------------------------------------------------------------------------------------|
| Funding | 22 | Give the source of funding and the role of the funders for the present study and, if applicable, for the original study on which the present article is based <b>P.13</b> |
|---------|----|---------------------------------------------------------------------------------------------------------------------------------------------------------------------------|

\*Give information separately for cases and controls in case-control studies and, if applicable, for exposed and unexposed groups in cohort and cross-sectional studies.

**Note:** An Explanation and Elaboration article discusses each checklist item and gives methodological background and published examples of transparent reporting. The STROBE checklist is best used in conjunction with this article (freely available on the Web sites of PLoS Medicine at <http://www.plosmedicine.org/>, Annals of Internal Medicine at <http://www.annals.org/>, and Epidemiology at <http://www.epidem.com/>). Information on the STROBE Initiative is available at [www.strobe-statement.org](http://www.strobe-statement.org).
